# Supplementary material
Source: PubMed Central journal article supplement (PMC3037835)
Supplement: NIHMS265254-supplement-1.pdf [file NIHMS265254-supplement-1.pdf]

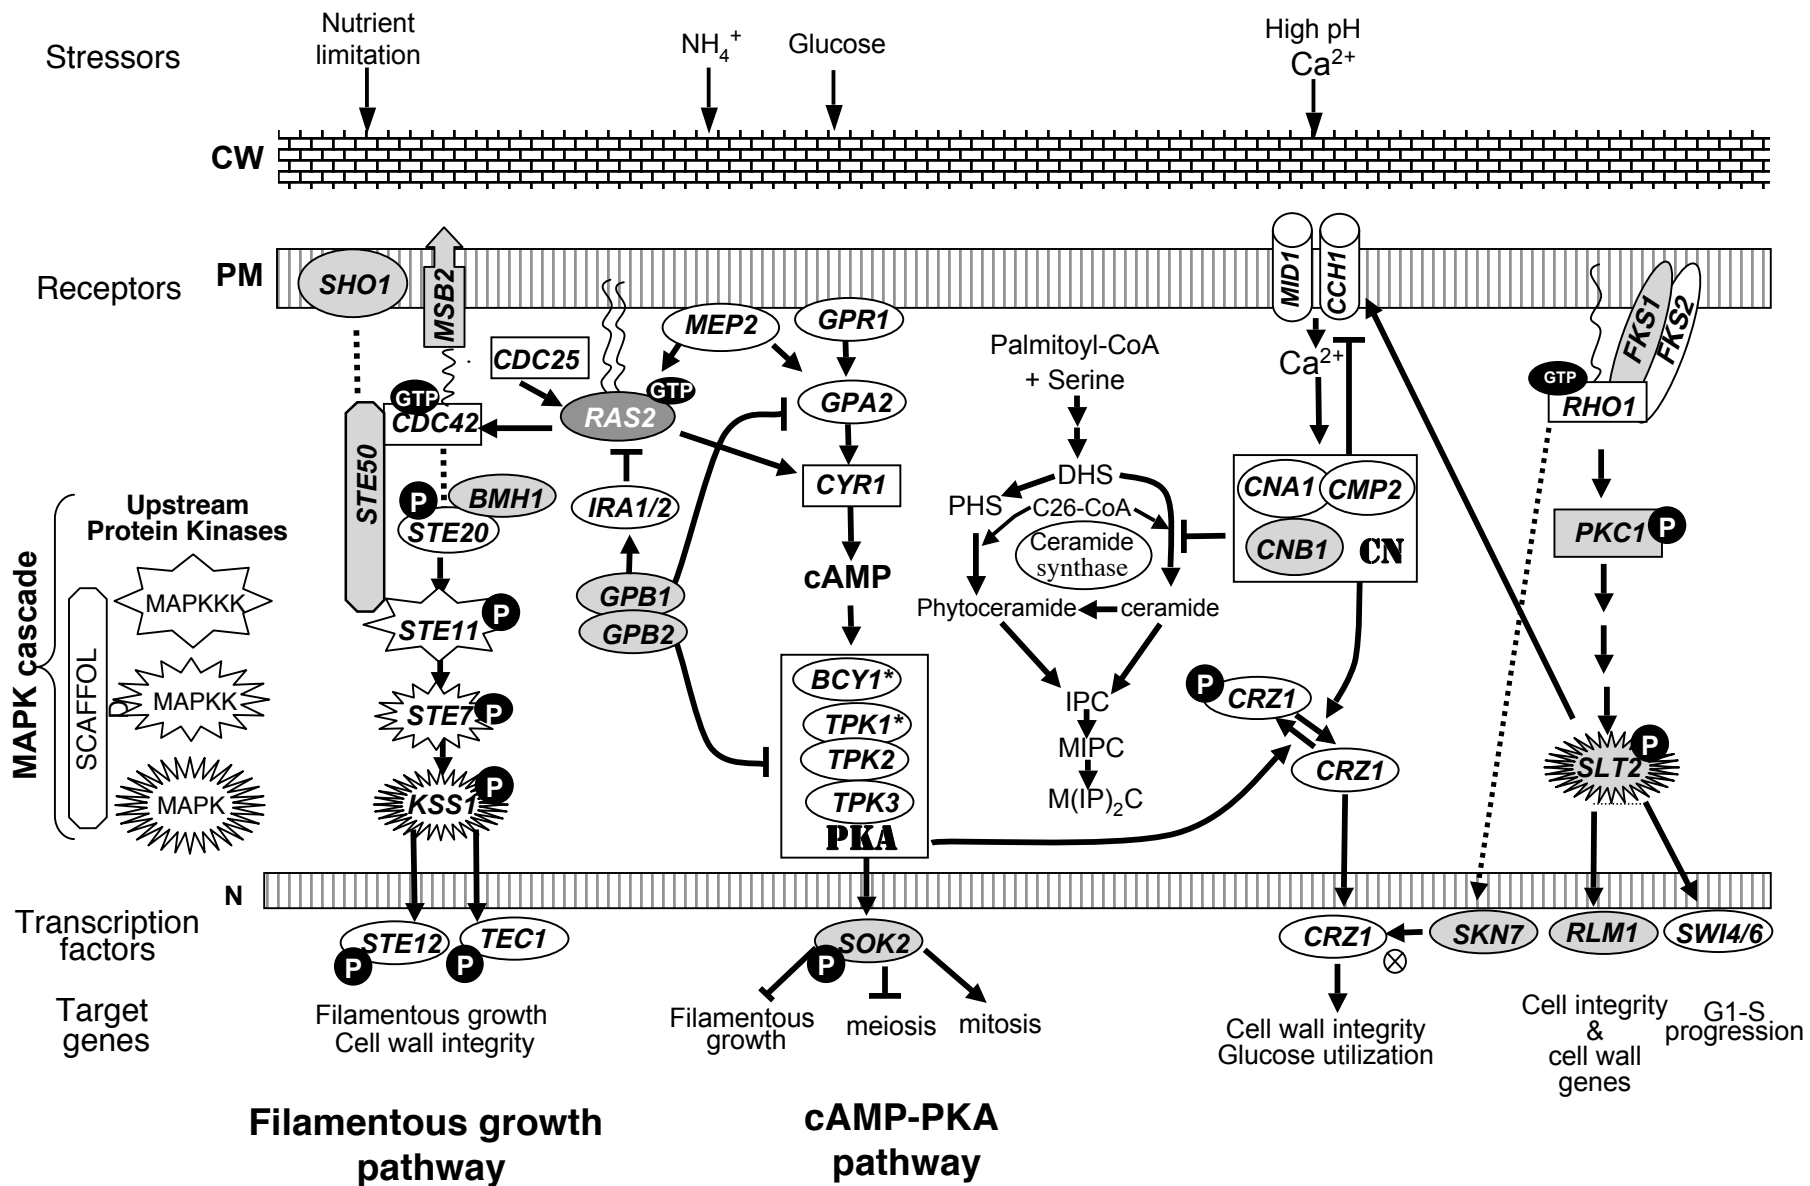

Figure S1

**Fig. S1** Mutants defective in the filamentous response, the cAMP-PKA and calcineurin pathways confer an  $\text{Ino}^-$  phenotypes. Mutations in genes shaded in grey confer an  $\text{Ino}^-$  phenotype. Genes enclosed in a rectangle are essential. Genes enclosed in a cylinder encode pore forming proteins. Genes enclosed in a box with an upward arrow encode glycosylated transmembrane sensors. A black circle with a white “P” represents a phosphorylation target. A black oval with white letters “GTP” indicates GTP binding of a GTP-binding protein. Genes encoding mitogen activated protein kinase (MAPK) cascade components (kinases and scaffold proteins) are indicated with star symbols and elongated octagons according to the key on the left side of the figure. CW, cell wall; PM, plasma membrane; N, nucleus
