# Supplementary material
Source: PubMed Central journal article supplement (PMC3037835)
Supplement: NIHMS265254-supplement-2.pdf [file NIHMS265254-supplement-2.pdf]

**TABLE S1****Deletion strains that confer an Ino- phenotype**

| ORF     | Gene         | I-C-<br>30° | I-C+<br>30° | I-C+<br>37° | Description                                                                                                                             | Reference  |
|---------|--------------|-------------|-------------|-------------|-----------------------------------------------------------------------------------------------------------------------------------------|------------|
| YJR083C | <i>ACF4</i>  | +           | +           | S           | Protein of unknown function                                                                                                             | This study |
| YDL203C | <i>ACK1</i>  | +           | +           | S           | Protein that functions upstream of the PKC-CWI signaling pathway                                                                        | This study |
| YDR448W | <i>ADA2</i>  | S           | W           | W           | Transcription coactivator, component of the ADA and SAGA transcriptional adaptor/HAT (histone acetyltransferase) complexes              | This study |
| YDR226W | <i>ADK1</i>  | S           | S           | S           | Adenylate kinase, required for purine metabolism                                                                                        | This study |
| YIL044C | <i>AGE2</i>  | +           | +           | S           | ADP-ribosylation factor (ARF) GTPase activating protein (GAP) effector, involved in Trans-Golgi-Network (TGN) transport                 | This study |
| YMR092C | <i>AIP1</i>  | +           | +           | W           | Actin cortical patch component, interacts with the actin depolymerizing factor cofilin                                                  | This study |
| YNL148C | <i>ALF1</i>  | W           | W           | S           | Alpha-tubulin folding protein, similar to mammalian cofactor B                                                                          | This study |
| YOR002W | <i>ALG6</i>  | +           | W           | S           | Glycosyltransferase of the ER, involved in N-linked protein glycosylation                                                               | This study |
| YOR067C | <i>ALG8</i>  | +           | W           | S           | Glycosyltransferase of the ER, involved in N-linked protein glycosylation                                                               | This study |
| YNL219C | <i>ALG9</i>  | +           | +           | W           | Mannosyltransferase of the ER, involved in N-linked glycosylation                                                                       | This study |
| YLR089C | <i>ALT1</i>  | VW          | VW          | W           | Putative alanine transaminase (glutamic pyruvic transaminase)                                                                           | This study |
| YML022W | <i>APT1</i>  | +           | +           | S           | Adenine phosphoribosyltransferase, catalyzes the formation of AMP from adenine and 5-phosphoribosylpyrophosphate                        | This study |
| YHR013C | <i>ARD1</i>  | W           | S           | S           | Subunit of the N-terminal acetyltransferase NatA (Nat1p, Ard1p, Nat5p)                                                                  | This study |
| YDL192W | <i>ARF1</i>  | +           | W           | S           | ADP-ribosylation factor, GTPase of the Ras superfamily involved in regulation of vesicles in intracellular trafficking within the Golgi | This study |
| YDR173C | <i>ARG82</i> | S           | S           | NG          | Inositol polyphosphate multikinase (IPMK), sequentially phosphorylates I(1,4,5)P <sub>3</sub> to I(1,3,4,5,6)P <sub>5</sub>             | This study |
| YPR201W | <i>ARR3</i>  | +           | VW          | S           | Arsenite transporter of the plasma membrane, required for resistance to arsenic compounds                                               | This study |
| YLR242C | <i>ARV1</i>  | W           | W           | S           | Protein functioning in transport of glycosylphosphatidylinositol intermediates into the ER lumen; required for sterol distribution      | This study |
| YJL115W | <i>ASF1</i>  | +           | +           | W           | Nucleosome assembly factor, involved in chromatin assembly after DNA replication                                                        | This study |
| YER101C | <i>AST2</i>  | +           | +           | W           | Protein that may have a role in targeting of plasma membrane [H <sup>+</sup> ]ATPase (Pma1p) to the plasma membrane                     | This study |
| YGL180W | <i>ATG1</i>  | +           | +           | W           | Protein serine/threonine kinase, required for autophagy and for the cytoplasm-to-vacuole targeting (Cvt) pathway                        | This study |
| YDR384C | <i>ATO3</i>  | +           | +           | W           | Plasma membrane protein, regulation pattern suggests a possible role in export of ammonia from the cell                                 | This study |
| YMR068W | <i>AVO2</i>  | +           | +           | S           | Component of the TORC2 complex containing the Tor2p kinase                                                                              | This study |
| YER167W | <i>BCK2</i>  | +           | +           | W           | Protein involved in the PKC-CWI signaling pathway                                                                                       | This study |

*(continued)*

**TABLE S1**  
**(Continued)**

| ORF     | Gene         | I-C-<br>30° | I-C+<br>30° | I-C+<br>37° | Description                                                                                                                         | Reference  |
|---------|--------------|-------------|-------------|-------------|-------------------------------------------------------------------------------------------------------------------------------------|------------|
| YER177W | <i>BMH1</i>  | +           | VW          | S           | 14-3-3 protein, major isoform involved in regulation of many processes such as exocytosis, vesicle transport, Ras/MAPK signaling    | This study |
| YLL015W | <i>BPT1</i>  | +           | +           | S           | ABC type transmembrane transporter of MRP/CFTR family                                                                               | This study |
| YDL074C | <i>BRE1</i>  | W           | W           | S           | E3 ubiquitin ligase for Rad6p, required for the ubiquitination of histone H2B, and subsequent methylation of histone H3             | This study |
| YLR015W | <i>BRE2</i>  | +           | +           | VW          | Subunit of the COMPASS (Set1C) complex, which methylates histone H3 on lysine 4                                                     | This study |
| YEL029C | <i>BUD16</i> | VW          | W           | S           | Protein involved in bud-site selection and telomere maintenance                                                                     | This study |
| YLR074C | <i>BUD20</i> | +           | +           | S           | Protein involved in bud-site selection                                                                                              | This study |
| YOR078W | <i>BUD21</i> | +           | VW          | VW          | Component of small ribosomal subunit (SSU) processosome that contains U3 snoRNA                                                     | This study |
| YMR014W | <i>BUD22</i> | +           | +           | W           | Protein involved in bud-site selection                                                                                              | This study |
| YCR047C | <i>BUD23</i> | +           | +           | S           | Methyltransferase, methylates residue G1575 of 18S rRNA; required for rRNA processing and nuclear export of 40S ribosomal subunits  | This study |
| YKR036C | <i>CAF4</i>  | +           | VW          | W           | WD40 repeat-containing protein associated with the CCR4-NOT complex                                                                 | This study |
| YDL069C | <i>CBS1</i>  | +           | +           | W           | Mitochondrial translational activator of the COB mRNA                                                                               | This study |
| YCR094W | <i>CDC50</i> | +           | +           | W           | Endosomal and TGN protein that regulates cell polarity; associates with DRS2; similar to Crf1p and Lem3p                            | This study |
| YLR418C | <i>CDC73</i> | S           | S           | S           | Constituent of Pafl complex                                                                                                         | This study |
| YHR142W | <i>CHS7</i>  | +           | VW          | S           | Protein of unknown function, involved in chitin biosynthesis                                                                        | This study |
| YPL241C | <i>CIN2</i>  | VW          | W           | W           | Tubulin folding factor C (putative) involved in Tub2p folding                                                                       | This study |
| YJL158C | <i>CIS3</i>  | +           | +           | W           | Mannose-containing glycoprotein constituent of the cell wall                                                                        | This study |
| YGR108W | <i>CLB1</i>  | +           | +           | W           | B-type cyclin that activates Cdc28p and is involved in transition from G2 to M phase of the cell cycle progression                  | This study |
| YAL040C | <i>CLN3</i>  | +           | +           | W           | G1 cyclin that activates Cdc28p kinase to promote G1 to S phase transition                                                          | This study |
| YKL190W | <i>CNBI</i>  | VW          | VW          | W           | Calcineurin B; the regulatory subunit of calcineurin, a Ca <sup>++</sup> /calmodulin-regulated protein phosphatase                  | This study |
| YAL058W | <i>CNE1</i>  | W           | W           | S           | Calnexin; integral membrane ER chaperone involved in folding and quality control of glycoproteins                                   | This study |
| YNL051W | <i>COG5</i>  | VW          | VW          | VW          | Component of the conserved oligomeric Golgi complex (COG)                                                                           | This study |
| YNL041C | <i>COG6</i>  | W           | W           | W           | Component of the conserved oligomeric Golgi complex (COG)                                                                           | This study |
| YML071C | <i>COG8</i>  | W           | W           | W           | Component of the conserved oligomeric Golgi complex (COG)                                                                           | This study |
| YER130C | <i>COM2</i>  | +           | VW          | S           | Protein of unknown function                                                                                                         | This study |
| YLR087C | <i>CSF1</i>  | W           | W           | W           | Protein required for fermentation at low temperature                                                                                | This study |
| YIL036W | <i>CST6</i>  | VW          | VW          | S           | Transcription factor of the ATF/CREB family, activates transcription of genes involved in utilization of non-optimal carbon sources | This study |

(continued)

**TABLE S1**  
(Continued)

| ORF     | Gene         | I-C-<br>30° | I-C+<br>30° | I-C+<br>37° | Description                                                                                                                     | Reference  |
|---------|--------------|-------------|-------------|-------------|---------------------------------------------------------------------------------------------------------------------------------|------------|
| YEL027W | <i>CUP5</i>  | S           | S           | S           | Proteolipid subunit of the vacuolar H(+)-ATPase V0 sector (subunit c)                                                           | This study |
| YPL177C | <i>CUP9</i>  | +           | VW          | W           | Transcriptional repressor of PTR2, which encodes a major peptide transporter                                                    | This study |
| YDR482C | <i>CWC21</i> | +           | +           | S           | Component of a complex containing Cef1p, putatively involved in pre-mRNA splicing                                               | This study |
| YGR092W | <i>DBF2</i>  | W           | S           | S           | Ser/Thr kinase involved in transcription and stress response; functions in exit from mitosis; Component of the CCR4-NOT complex | This study |
| YDR411C | <i>DFM1</i>  | +           | +           | W           | Protein of unknown function, localizes to the ER                                                                                | This study |
| YKL121W | <i>DGR2</i>  | +           | +           | S           | Protein of unknown function; null mutant is resistant to 2-deoxy-D-glucose                                                      | This study |
| YGR227W | <i>DIE2</i>  | +           | +           | S           | Glucosyl transferase of the ER, involved in N-linked protein glycosylation, has a role in regulation of ITR1 and INO1           | This study |
| YDR403W | <i>DIT1</i>  | +           | +           | S           | Sporulation-specific enzyme required for spore wall maturation                                                                  | This study |
| YKL213C | <i>DOA1</i>  | W           | W           | S           | WD repeat protein required for ubiquitin-mediated protein degradation, forms complex with Cdc48p                                | This study |
| YDR294C | <i>DPL1</i>  | +           | +           | W           | Dihydrosphingosine phosphate lyase, regulates intracellular levels of sphingolipid long-chain base phosphates (LCBPs)           | This study |
| YAL026C | <i>DRS2</i>  | +           | +           | S           | Integral membrane Ca(2+)-ATPase involved in aminophospholipid translocation (flipase)                                           | This study |
| YMR276W | <i>DSK2</i>  | +           | VW          | S           | Ubiquitin-like polyubiquitin-binding protein, involved in proteolysis, interacts with the proteasome                            | This study |
| YLR436C | <i>ECM30</i> | +           | +           | W           | Non-essential protein of unknown function                                                                                       | This study |
| YBL047C | <i>EDE1</i>  | +           | +           | W           | Endocytic protein that binds membranes in a ubiquitin-dependent manner                                                          | This study |
| YDR385W | <i>EFT2</i>  | +           | +           | S           | Elongation factor 2 (EF-2), also encoded by EFT1                                                                                | This study |
| YKL160W | <i>ELF1</i>  | VW          | W           | S           | Transcription elongation factor implicated in the maintenance of proper chromatin structure                                     | This study |
| YKL048C | <i>ELM1</i>  | +           | +           | S           | Ser/Thr kinase that regulates cellular morphogenesis, septin behavior, and cytokinesis                                          | This study |
| YMR312W | <i>ELP6</i>  | +           | VW          | VW          | Subunit of Elongator complex                                                                                                    | This study |
| YCL045C | <i>EMC1</i>  | +           | +           | W           | Member of a transmembrane complex required for efficient folding of proteins in the ER                                          | This study |
| YNL080C | <i>EOS1</i>  | W           | S           | S           | Putative protein of unknown function predicted to contain transmembrane domains                                                 | This study |
| YMR202W | <i>ERG2</i>  | W           | W           | S           | C-8 sterol isomerase, at an intermediate step in ergosterol biosynthesis                                                        | This study |
| YLR056W | <i>ERG3</i>  | W           | W           | S           | C-5 sterol desaturase, in ergosterol biosynthesis                                                                               | This study |
| YGL012W | <i>ERG4</i>  | +           | W           | S           | C-24(28) sterol reductase, catalyzes the final step in ergosterol biosynthesis                                                  | This study |
| YMR015C | <i>ERG5</i>  | +           | +           | S           | C-22 sterol desaturase, catalyzes the formation of the C-22(23) double bond in the sterol side chain in ergosterol biosynthesis | This study |
| YML008C | <i>ERG6</i>  | W           | W           | S           | Delta(24)-sterol C-methyltransferase, converts zymosterol to fecosterol in the ergosterol biosynthetic pathway                  | This study |
| YGL054C | <i>ERV14</i> | W           | W           | S           | Protein localized to COPII-coated vesicles, involved in vesicle formation                                                       | This study |

(continued)

**TABLE S1**  
**(Continued)**

| ORF     | Gene         | I-C-<br>30° | I-C+<br>30° | I-C+<br>37° | Description                                                                                                                        | Reference  |
|---------|--------------|-------------|-------------|-------------|------------------------------------------------------------------------------------------------------------------------------------|------------|
| YDR363W | <i>ESC2</i>  | VW          | VW          | S           | Protein involved in mating-type locus silencing, interacts with Sir2p                                                              | This study |
| YBR026C | <i>ETR1</i>  | +           | W           | W           | 2-enoyl thioester reductase localized to in mitochondria                                                                           | This study |
| YFR019W | <i>FAB1</i>  | S           | S           | NG          | 1-phosphatidylinositol-3-phosphate 5-kinase that generates PI(3,5)P <sub>2</sub> ,                                                 | This study |
| YNL127W | <i>FAR11</i> | +           | +           | W           | Protein involved in G1 cell cycle arrest in response to pheromone, in a Far1p-independent pathway                                  | This study |
| YMR052W | <i>FAR3</i>  | +           | +           | W           | Protein involved in G1 cell cycle arrest in response to pheromone, in a Far1p-independent pathway                                  | This study |
| YMR029C | <i>FAR8</i>  | +           | +           | S           | Protein involved in G1 cell cycle arrest in response to pheromone, in a Far1p-independent pathway                                  | This study |
| YJL155C | <i>FBP26</i> | VW          | VW          | S           | Fructose-2,6-bisphosphatase, required for glucose metabolism                                                                       | This study |
| YCR089W | <i>FIG2</i>  | +           | +           | W           | Cell wall adhesin containing a GPI anchor, expressed specifically during mating                                                    | This study |
| YLR342W | <i>FKS1</i>  | VW          | VW          | S           | Catalytic subunit of 1,3-beta-D-glucan synthase, alternate catalytic subunit Gsc2p; binds to Rho1p                                 | This study |
| YHR199C | <i>FMP34</i> | W           | VW          | S           | The authentic, non-tagged protein was localized to the mitochondria                                                                | This study |
| YLL043W | <i>FPS1</i>  | +           | VW          | NG          | Plasma membrane glycerol channel, involved in efflux of glycerol and in uptake of the trivalent metalloid arsenite and acetic acid | This study |
| YNL133C | <i>FYV6</i>  | VW          | W           | NG          | Protein of unknown function, required for survival to K1 killer toxin                                                              | This study |
| YER027C | <i>GAL83</i> | +           | +           | S           | One of three beta-subunits of the Snf1 kinase complex                                                                              | This study |
| YMR307W | <i>GAS1</i>  | +           | VW          | S           | Beta-1.3-glucanosyltransferase with a GPI anchor, required for cell wall assembly                                                  | This study |
| YDR283C | <i>GCN2</i>  | +           | +           | S           | Protein kinase, phosphorylates the alpha-subunit of translation initiation factor eIF2 (Sui2p) in response to starvation           | This study |
| YKR026C | <i>GCN3</i>  | W           | W           | S           | Alpha subunit of the translation initiation factor eIF2B                                                                           | This study |
| YGR252W | <i>GCN5</i>  | VW          | VW          | VW          | Histone acetyltransferase; catalytic subunit of the ADA and SAGA histone acetyltransferase complexes                               | This study |
| YGL020C | <i>GET1</i>  | +           | W           | S           | Subunit of the GET complex; involved in Golgi to ER retrieval                                                                      | This study |
| YER083C | <i>GET2</i>  | W           | W           | NG          | Subunit of the GET complex; involved in Golgi to ER retrieval                                                                      | This study |
| YDR358W | <i>GGA1</i>  | +           | +           | VW          | Golgi-localized protein with homology to gamma-adaptin                                                                             | This study |
| YCR098C | <i>GIT1</i>  | +           | VW          | W           | Plasma membrane permease, of glycerophosphoinositol and glycerophosphocholine as sources of inositol and phosphate                 | This study |
| YER122C | <i>GLO3</i>  | W           | VW          | W           | ADP-ribosylation factor GTPase activating protein (ARF GAP), involved in ER-Golgi transport                                        | This study |
| YOR320C | <i>GNT1</i>  | +           | W           | S           | N-acetylglucosaminyltransferase capable of modification of N-linked glycans in the Golgi apparatus                                 | This study |
| YOR371C | <i>GPB1</i>  | +           | +           | W           | Multistep regulator of cAMP-PKA signaling; inhibits Ras activity through direct interactions with Ira1p/2p                         | This study |
| YAL056W | <i>GPB2</i>  | +           | +           | S           | Multistep regulator of cAMP-PKA signaling; inhibits Ras activity through direct interactions with Ira1p/2p                         | This study |

(continued)

**TABLE S1**  
(Continued)

| ORF     | Gene         | I-C-<br>30° | I-C+<br>30° | I-C+<br>37° | Description                                                                                                                                 | Reference  |
|---------|--------------|-------------|-------------|-------------|---------------------------------------------------------------------------------------------------------------------------------------------|------------|
| YDL022W | <i>GPD1</i>  | +           | +           | W           | NAD <sup>+</sup> -dependent glycerol-3-phosphate dehydrogenase, key enzyme of glycerol synthesis, essential for growth under osmotic stress | This study |
| YOL059W | <i>GPD2</i>  | W           | W           | W           | NAD <sup>+</sup> -dependent glycerol 3-phosphate dehydrogenase, homolog of Gpd1p, located in cytosol and mitochondria                       | This study |
| YDL021W | <i>GPM2</i>  | +           | +           | W           | Homolog of Gpm1p phosphoglycerate mutase which converts 3-phosphoglycerate to 2-phosphoglycerate                                            | This study |
| YHR104W | <i>GRE3</i>  | VW          | W           | S           | NADP <sup>+</sup> -dependant glycerol dehydrogenase; regulated by the HOG pathway                                                           | This study |
| YER174C | <i>GRX4</i>  | +           | W           | S           | Hydroperoxide and superoxide-radical responsive glutathione-dependent oxidoreductase                                                        | This study |
| YDL010W | <i>GRY6</i>  | +           | +           | W           | Cis-golgi localized monothiol glutaredoxin that binds an iron-sulfur cluster; involved in the oxidative stress response                     | This study |
| YGL181W | <i>GTS1</i>  | +           | +           | W           | Arf3p GTPase Activating Protein (GAP) that localizes to endocytic patches                                                                   | This study |
| YOR070C | <i>GYP1</i>  | S           | S           | S           | Cis-golgi GTPase-activating protein (GAP) for the Ypt1p (in vivo) and for Ypt1p, Sec4p, Ypt7p, and Ypt51p (in vitro)                        | This study |
| YLR192C | <i>HCRI</i>  | +           | +           | S           | Protein involved in translation initiation as a component of eukaryotic eIF3 and required for processing of 20S pre-rRNA                    | This study |
| YPR179C | <i>HDA3</i>  | +           | +           | S           | Subunit of a histone deacetylase (HDA1) complex that contains an Hda1p homodimer and an Hda2p-Hda3p heterodimer                             | This study |
| YDR174W | <i>HMO1</i>  | +           | +           | W           | Chromatin associated high mobility group (HMG) member involved in genome maintenance                                                        | This study |
| YJR075W | <i>HOC1</i>  | +           | +           | W           | Alpha-1,6-mannosyltransferase subunit of a Golgi-localized complex that also contains Anp1p, Mnn9p, Mnn11p, and Mnn10p                      | This study |
| YLR113W | <i>HOG1</i>  | W           | W           | W           | Mitogen-activated protein kinase involved in osmoregulation; yeast homolog of the mammalian p38 MAPK.                                       | This study |
| YIL072W | <i>HOP1</i>  | +           | VW          | S           | Meiosis-specific DNA binding protein required for homologous chromosome synapsis and chiasma formation                                      | This study |
| YDR399W | <i>HPT1</i>  | +           | +           | W           | Dimeric hypoxanthine-guanine phosphoribosyltransferase; yeast homolog of the human HPRT1p                                                   | This study |
| YBR133C | <i>HSL7</i>  | +           | +           | S           | Protein arginine N-methyltransferase; required along with Hsl1p for bud neck recruitment, phosphorylation, and degradation of Swe1p         | This study |
| YBR272C | <i>HSM3</i>  | +           | +           | S           | Protein of unknown function, involved in DNA mismatch repair during slow growth                                                             | This study |
| YCR021C | <i>HSP30</i> | +           | +           | W           | Hydrophobic plasma membrane localized, stress-responsive protein that negatively regulates the H(+)-ATPase Pma1p                            | This study |
| YOL068C | <i>HST1</i>  | VW          | VW          | VW          | Histone deacetylase; essential subunit of the Sum1p/Rfm1p/Hst1p complex; non-essential subunit of the Set3C complex                         | This study |
| YGR223C | <i>HSV2</i>  | +           | +           | VW          | Phosphatidylinositol 3,5-bisphosphate-binding protein, predicted to fold as a seven-bladed beta-propeller                                   | This study |

(continued)

**TABLE S1**  
**(Continued)**

| ORF     | Gene         | I-C-<br>30° | I-C+<br>30° | I-C+<br>37° | Description                                                                                                                         | Reference  |
|---------|--------------|-------------|-------------|-------------|-------------------------------------------------------------------------------------------------------------------------------------|------------|
| YGL168W | <i>HUR1</i>  | W           | W           | S           | Protein required for hydroxyurea resistance                                                                                         | This study |
| YJL214W | <i>HXT8</i>  | +           | +           | W           | Protein of unknown function with similarity to hexose transporters                                                                  | This study |
| YDL066W | <i>IDP1</i>  | +           | VW          | S           | Mitochondrial NADP-specific isocitrate dehydrogenase                                                                                | This study |
| YFL013C | <i>IES1</i>  | +           | +           | S           | Subunit of the Ino80 chromatin remodeling complex                                                                                   | This study |
| YNL215W | <i>IES2</i>  | W           | W           | NG          | Protein that associates with the Ino80 chromatin remodeling complex under low-salt conditions                                       | This study |
| YOR189W | <i>IES4</i>  | VW          | W           | S           | Protein that associates with the Ino80 chromatin remodeling complex under low-salt conditions                                       | This study |
| YER092W | <i>IES5</i>  | +           | +           | S           | Protein that associates with the Ino80 chromatin remodeling complex under low-salt conditions                                       | This study |
| YBR107C | <i>IML3</i>  | W           | W           | S           | Protein with a role in kinetochore function                                                                                         | This study |
| YLR021W | <i>IRC25</i> | +           | +           | S           | Component of a heterodimeric Poc4p-Irc25p chaperone involved in assembly of alpha subunits into the 20S proteasome                  | This study |
| YDR540C | <i>IRC4</i>  | +           | W           | S           | Putative protein of unknown function                                                                                                | This study |
| YKL032C | <i>IXR1</i>  | +           | +           | S           | Protein that binds DNA containing intrastrand cross-links formed by cisplatin                                                       | This study |
| YDR017C | <i>KCS1</i>  | W           | W           | S           | Inositol hexaphosphate kinase, phosphorylates inositol hexakisphosphate (IP <sub>6</sub> ) to diphosphoinositol polyphosphates      | This study |
| YGL203C | <i>KEX1</i>  | +           | +           | S           | Protease involved in the processing of killer toxin and alpha factor precursor                                                      | This study |
| YLL019C | <i>KNS1</i>  | +           | +           | W           | Nonessential putative protein kinase of unknown cellular role                                                                       | This study |
| YNL322C | <i>KRE1</i>  | +           | +           | S           | Cell wall GPI-anchored glycoprotein involved in beta-glucan assembly; serves as a K1 killer toxin membrane receptor                 | This study |
| YGR166W | <i>KRE11</i> | +           | +           | S           | Subunit of the TRAPP (transport protein particle) complex; involved in the late steps of endoplasmic reticulum to Golgi transport   | This study |
| YIL027C | <i>KRE27</i> | +           | VW          | W           | Protein of unknown function; null mutant shows K1 killer toxin resistance                                                           | This study |
| YJL134W | <i>LCB3</i>  | VW          | W           | S           | Long-chain base-1-phosphate phosphatase, regulates ceramide and long-chain base phosphates levels                                   | This study |
| YOR322C | <i>LDB19</i> | +           | VW          | NG          | Protein involved in regulating the endocytosis of plasma membrane proteins by recruiting the ubiquitin ligase Rsp5p to its target   | This study |
| YNL323W | <i>LEM3</i>  | +           | VW          | W           | Plasma membrane and ER protein, involved in translocation of phospholipids and lyso-PE and lyso-PC across the plasma membrane       | This study |
| YOR123C | <i>LEO1</i>  | W           | W           | S           | Component of the Paf1 complex                                                                                                       | This study |
| YPL055C | <i>LGE1</i>  | +           | W           | S           | Protein of unknown function; null mutant forms abnormally large cells                                                               | This study |
| YDR439W | <i>LRS4</i>  | +           | VW          | W           | Protein involved in rDNA silencing                                                                                                  | This study |
| YKL176C | <i>LST4</i>  | +           | +           | W           | Protein possibly involved in a post-Golgi secretory pathway; required for the transport of Gap1p from the Golgi to the cell surface | This study |
| YGR057C | <i>LST7</i>  | +           | VW          | S           | Protein possibly involved in a post-Golgi secretory pathway; required for the transport of Gap1p from the Golgi to the cell surface | This study |

(continued)

**TABLE S1**  
(Continued)

| ORF       | Gene         | I-C-<br>30° | I-C+<br>30° | I-C+<br>37° | Description                                                                                                                            | Reference  |
|-----------|--------------|-------------|-------------|-------------|----------------------------------------------------------------------------------------------------------------------------------------|------------|
| YAL024C   | <i>LTE1</i>  | W           | W           | W           | Putative GDP/GTP exchange factor (GEF) for Tem1p, required for mitotic exit at low temperatures; physically associates with Ras2p-GTP  | This study |
| YNL307C   | <i>MCK1</i>  | +           | VW          | W           | Ser/Thr /Tyr (dual-specificity) kinase involved in control of chromosome segregation and in regulating entry into meiosis              | This study |
| YGL219C   | <i>MDM34</i> | W           | S           | S           | Mitochondrial outer membrane protein, required for normal mitochondrial morphology and inheritance                                     | This study |
| YKL053C-A | <i>MDM35</i> | W           | W           | NG          | Protein of unknown function; mutation affects mitochondrial distribution and morphology                                                | This study |
| YOL111C   | <i>MDY2</i>  | +           | +           | S           | Protein required for efficient mating; involved in shmoo formation and nuclear migration in the pre-zygote                             | This study |
| YKR007W   | <i>MEH1</i>  | +           | +           | S           | Component of the EGO complex; involved with the TORC1 complex in the regulation of microautophagy, and amino acid signaling            | This study |
| YPR167C   | <i>MET16</i> | +           | +           | S           | 3'-phosphoadenylylsulfate reductase; involved in sulfate assimilation and methionine metabolism                                        | This study |
| YLR332W   | <i>MID2</i>  | +           | VW          | W           | O-glycosylated plasma membrane sensor to activate the PKC-CWI signaling pathway; interacts with Rom2p and Zeo1p                        | This study |
| YPL140C   | <i>MKK2</i>  | +           | +           | W           | Mitogen-activated kinase kinase involved in protein kinase C signaling pathway; functionally redundant with Mkk1p                      | This study |
| YLR320W   | <i>MMS22</i> | W           | W           | S           | Protein involved in resistance to ionizing radiation                                                                                   | This study |
| YBR015C   | <i>MNN2</i>  | +           | +           | W           | Alpha-1,2-mannosyltransferase, involved in branched glycosylation in an early Golgi compartment                                        | This study |
| YKL064W   | <i>MNR2</i>  | +           | +           | W           | Putative magnesium transporter; has similarity to Alr1p and Alr2p, which mediate influx of Mg <sup>2+</sup> and other divalent cations | This study |
| YGR014W   | <i>MSB2</i>  | +           | VW          | W           | Mucin family member involved in the filamentous growth signaling pathway; also functions as an osmosensor in parallel with Sho1p       | This study |
| YOL090W   | <i>MSH2</i>  | W           | VW          | S           | Protein that forms heterodimers with Msh3p and Msh6p that bind to DNA mismatches to initiate the mismatch repair process               | This study |
| YOL116W   | <i>MSN1</i>  | +           | +           | W           | Transcriptional activator involved in regulation of invertase and glucoamylase expression, invasive and pseudohyphal growth            | This study |
| YDR335W   | <i>MSN5</i>  | +           | +           | S           | Karyopherin involved in nuclear import and export; responsible for nuclear import of protein A and proteins Swi6p, Far1p, and Pho4p    | This study |
| YDR277C   | <i>MTH1</i>  | +           | +           | W           | Negative regulator of the glucose-sensing signal transduction pathway                                                                  | This study |
| YML117W   | <i>NAB6</i>  | +           | +           | S           | Putative RNA-binding protein, based on computational analysis                                                                          | This study |
| YDL040C   | <i>NAT1</i>  | VW          | W           | S           | Subunit of the N-terminal acetyltransferase NatA (Nat1p, Ard1p, Nat5p)                                                                 | This study |
| YDR162C   | <i>NBP2</i>  | +           | +           | S           | Protein involved in the HOG pathway, negatively regulates Hog1p by recruitment of phosphatase Ptc1p to the Pbs2p-Hog1p complex         | This study |
| YNL119W   | <i>NCS2</i>  | VW          | VW          | VW          | Protein with a role in urmylation and in invasive and pseudohyphal growth                                                              | This study |

(continued)

**TABLE S1**  
**(Continued)**

| ORF     | Gene          | I-C-<br>30° | I-C+<br>30° | I-C+<br>37° | Description                                                                                                                                                         | Reference  |
|---------|---------------|-------------|-------------|-------------|---------------------------------------------------------------------------------------------------------------------------------------------------------------------|------------|
| YGL211W | <i>NCS6</i>   | +           | VW          | S           | Protein with a role in urmylation and in invasive and pseudohyphal growth                                                                                           | This study |
| YPL226W | <i>NEW1</i>   | W           | S           | S           | ATP binding cassette protein that cosediments with polysomes and is required for biogenesis of the small ribosomal subunit                                          | This study |
| YDR176W | <i>NGG1</i>   | VW          | W           | W           | Transcriptional regulator involved in glucose repression of Gal4p-regulated genes; component of the SAGA complex                                                    | This study |
| YDL002C | <i>NHP10</i>  | +           | +           | S           | Protein related to mammalian high mobility group proteins; likely component of the INO80 complex                                                                    | This study |
| YPL174C | <i>NIP100</i> | VW          | W           | W           | Large subunit of the dyactin complex; putative ortholog of mammalian p150(glued)                                                                                    | This study |
| YLR315W | <i>NKP2</i>   | W           | S           | NG          | Non-essential kinetochore protein, subunit of the Ctf19 central kinetochore complex                                                                                 | This study |
| YDR432W | <i>NPL3</i>   | S           | S           | NG          | RNA-binding protein that carries poly(A)+ mRNA from the nucleus into the cytoplasm                                                                                  | This study |
| YDR043C | <i>NRG1</i>   | +           | +           | S           | Transcriptional repressor that recruits the Cyc8p-Tup1p complex to promoters; mediates glucose repression and regulates filamentous growth and alkaline pH response | This study |
| YJL208C | <i>NUC1</i>   | +           | +           | S           | Major mitochondrial nuclease, has RNase and DNA endo- and exonucleolytic activities; has a role in mitochondrial recombination                                      | This study |
| YML103C | <i>NUP188</i> | W           | W           | S           | Subunit of the nuclear pore complex (NPC), involved in the structural organization of the complex and of the nuclear envelope                                       | This study |
| YAL051W | <i>OAF1</i>   | +           | +           | W           | Oleate-activated transcription factor, acts alone and as a heterodimer with Pip2p                                                                                   | This study |
| YJL212C | <i>OPT1</i>   | +           | +           | W           | Plasma membrane transporter that transports tetra- and pentapeptides and glutathione; member of the OPT family                                                      | This study |
| YHR179W | <i>OYE2</i>   | VW          | W           | S           | Widely conserved NADPH oxidoreductase containing flavin mononucleotide (FMN)                                                                                        | This study |
| YDR071C | <i>PAA1</i>   | +           | +           | S           | Polyamine acetyltransferase; acetylates polyamines such as putrescine, spermidine and spermine                                                                      | This study |
| YDL173W | <i>PAR32</i>  | +           | VW          | W           | Putative protein of unknown function; hyperphosphorylated upon rapamycin treatment in a Tap42p-dependent manner                                                     | This study |
| YJL128C | <i>PBS2</i>   | W           | W           | S           | MAP kinase kinase that plays a pivotal role in the osmosensing signal-transduction pathway, activated under severe osmotic stress                                   | This study |
| YER059W | <i>PCL6</i>   | +           | +           | W           | Pho85p cyclin of the Pho80p subfamily; forms the major Glc8p kinase together with Pcl7p and Pho85p                                                                  | This study |
| YBR221C | <i>PDB1</i>   | VW          | +           | W           | E1 beta subunit of the pyruvate dehydrogenase (PDH) complex                                                                                                         | This study |
| YLR134W | <i>PDC5</i>   | VW          | W           | S           | Minor isoform of pyruvate decarboxylase, key enzyme in alcoholic fermentation, decarboxylates pyruvate to acetaldehyde                                              | This study |
| YER149C | <i>PEA2</i>   | +           | +           | S           | Polarisome protein required for polarized morphogenesis, cell fusion; forms polarisome complex with Bni1p, Bud6p, and Spa2p                                         | This study |

(continued)



**TABLE S1****(Continued)**

| ORF     | Gene         | I-C-<br>30° | I-C+<br>30° | I-C+<br>37° | Description                                                                                                                            | Reference  |
|---------|--------------|-------------|-------------|-------------|----------------------------------------------------------------------------------------------------------------------------------------|------------|
| YPL159C | <i>PET20</i> | VW          | VW          | W           | Mitochondrial protein, required for respiratory growth and for stability of the mitochondrial genome                                   | This study |
| YLR324W | <i>PEX30</i> | +           | +           | W           | Peroxisomal integral membrane protein, involved in negative regulation of peroxisome number                                            | This study |
| YGL025C | <i>PGD1</i>  | S           | S           | S           | Subunit of the SRB/Mediator global transcriptional cofactor complex, which is part of the RNA polymerase II holoenzyme                 | This study |
| YJL117W | <i>PHO86</i> | +           | +           | W           | Endoplasmic reticulum (ER) resident protein required for ER exit of Pho84p in COPII vesicles                                           | This study |
| YBR106W | <i>PHO88</i> | W           | W           | S           | Probable membrane protein, involved in phosphate transport                                                                             | This study |
| YMR123W | <i>PKR1</i>  | +           | VW          | W           | V-ATPase assembly factor, functions with other V-ATPase assembly factors in the ER                                                     | This study |
| YLR016C | <i>PML1</i>  | +           | +           | VW          | Subunit of the RES complex, which is required for nuclear retention of unspliced pre-mRNAs                                             | This study |
| YDR276C | <i>PMP3</i>  | +           | +           | W           | Plasma membrane protein related to a family of plant polypeptides that are overexpressed under high salt or low temperature            | This study |
| YGL167C | <i>PMR1</i>  | W           | W           | S           | High affinity Ca <sup>2+</sup> /Mn <sup>2+</sup> P-type ATPase required for Ca <sup>2+</sup> and Mn <sup>2+</sup> transport into Golgi | This study |
| YDL095W | <i>PMT1</i>  | +           | VW          | S           | Protein O-mannosyltransferase in the ER, transfers mannose residues to protein Ser/Thr residues; in a complex with Pmt2p               | This study |
| YAL023C | <i>PMT2</i>  | W           | W           | S           | Protein O-mannosyltransferase in the ER, transfers mannose residues to protein Ser/Thr residues; in a complex with Pmt1p               | This study |
| YPL144W | <i>POC4</i>  | VW          | VW          | S           | Component of a heterodimeric Poc4p-Irc25p chaperone involved in assembly of alpha subunits into the 20S proteasome                     | This study |
| YHR026W | <i>PPA1</i>  | S           | S           | S           | Subunit c" of the vacuolar ATPase, which functions in acidification of the vacuole; subunit of the V0 domain                           | This study |
| YGR135W | <i>PRE9</i>  | +           | +           | S           | 20S proteasome beta-type subunit; the only nonessential 20S subunit                                                                    | This study |
| YDR300C | <i>PRO1</i>  | +           | +           | W           | Gamma-glutamyl kinase, catalyzes the first step in proline biosynthesis                                                                | This study |
| YDL006W | <i>PTC1</i>  | W           | W           | NG          | Type 2C protein phosphatase (PP2C); inactivates the osmosensing MAPK cascade by dephosphorylating Hog1p                                | This study |
| YGL062W | <i>PYC1</i>  | W           | W           | S           | Pyruvate carboxylase isoform, cytoplasmic enzyme that converts pyruvate to oxaloacetate                                                | This study |
| YEL037C | <i>RAD23</i> | +           | +           | W           | Protein with ubiquitin-like N terminus, recognizes and binds damaged DNA (with Rad4p) during nucleotide excision repair                | This study |
| YER095W | <i>RAD51</i> | +           | +           | W           | Strand exchange protein, forms a helical filament with DNA that searches for homology                                                  | This study |
| YGL058W | <i>RAD6</i>  | VW          | W           | S           | Ubiquitin-conjugating enzyme (E2), part of H2B ubiquitination complex                                                                  | This study |
| YJL204C | <i>RCY1</i>  | +           | VW          | S           | F-box protein involved in recycling plasma membrane proteins internalized by endocytosis; localized to sites of polarized growth       | This study |
| YDR379W | <i>RGA2</i>  | +           | +           | W           | GTPase-activating protein for the polarity-establishment protein Cdc42p                                                                | This study |

*(continued)*

**TABLE S1**  
(Continued)

| ORF     | Gene          | I-C-<br>30° | I-C+<br>30° | I-C+<br>37° | Description                                                                                                            | Reference  |
|---------|---------------|-------------|-------------|-------------|------------------------------------------------------------------------------------------------------------------------|------------|
| YPL089C | <i>RLM1</i>   | +           | VW          | S           | Transcription factor, component of the protein kinase C-mediated MAP kinase pathway; activated by the MAP-kinase Slt2p | This study |
| YDL001W | <i>RMD1</i>   | +           | +           | S           | Cytoplasmic protein required for sporulation                                                                           | This study |
| YFR048W | <i>RMD8</i>   | +           | +           | S           | Cytosolic protein required for sporulation                                                                             | This study |
| YLR371W | <i>ROM2</i>   | VW          | W           | S           | GDP/GTP exchange protein (GEP) for Rho1p and Rho2p                                                                     | This study |
| YJL121C | <i>RPE1</i>   | VW          | W           | S           | D-ribulose-5-phosphate 3-epimerase, catalyzes a reaction in the non-oxidative part of the pentose-phosphate pathway    | This study |
| YER169W | <i>RPH1</i>   | +           | W           | S           | Transcriptional repressor of PHR1, which is a photolyase induced by DNA damage                                         | This study |
| YIL119C | <i>RPI1</i>   | +           | +           | W           | Putative transcriptional regulator; overexpression suppresses the heat shock sensitivity of wild-type RAS2             | This study |
| YKL006W | <i>RPL14A</i> | VW          | W           | S           | Protein component of the large (60S) ribosomal subunit                                                                 | This study |
| YBL027W | <i>RPL19B</i> | +           | VW          | W           | Protein component of the large (60S) ribosomal subunit                                                                 | This study |
| YMR242C | <i>RPL20A</i> | +           | VW          | W           | Protein component of the large (60S) ribosomal subunit                                                                 | This study |
| YBR191W | <i>RPL21A</i> | +           | VW          | W           | Protein component of the large (60S) ribosomal subunit                                                                 | This study |
| YLR061W | <i>RPL22A</i> | W           | W           | VW          | Protein component of the large (60S) ribosomal subunit, has similarity to Rpl22Bp                                      | This study |
| YGL031C | <i>RPL24A</i> | +           | +           | VW          | Ribosomal protein L30 of the large (60S) ribosomal subunit                                                             | This study |
| YHR010W | <i>RPL27A</i> | W           | S           | S           | Protein component of the large (60S) ribosomal subunit                                                                 | This study |
| YDL191W | <i>RPL35A</i> | W           | W           | S           | Protein component of the large (60S) ribosomal subunit                                                                 | This study |
| YPR043W | <i>RPL43A</i> | VW          | VW          | VW          | Protein component of the large (60S) ribosomal subunit                                                                 | This study |
| YDL020C | <i>RPN4</i>   | +           | VW          | VW          | Transcription factor that stimulates expression of proteasome genes                                                    | This study |
| YDL081C | <i>RPP1A</i>  | +           | +           | S           | Ribosomal protein P1 alpha, a component of the ribosomal stalk                                                         | This study |
| YDL130W | <i>RPP1B</i>  | +           | +           | S           | Ribosomal protein P1 beta, component of the ribosomal stalk                                                            | This study |
| YLR048W | <i>RPS0B</i>  | W           | W           | W           | Protein component of the small (40S) ribosomal subunit                                                                 | This study |
| YDL083C | <i>RPS16B</i> | +           | +           | S           | Protein component of the small (40S) ribosomal subunit                                                                 | This study |
| YOL121C | <i>RPS19A</i> | +           | +           | S           | Protein component of the small (40S) ribosomal subunit                                                                 | This study |
| YOR096W | <i>RPS7A</i>  | VW          | VW          | W           | Protein component of the small (40S) ribosomal subunit                                                                 | This study |
| YBR189W | <i>RPS9B</i>  | +           | W           | W           | Protein component of the small (40S) ribosomal subunit                                                                 | This study |
| YIL153W | <i>RRD1</i>   | +           | +           | W           | Peptidyl-prolyl cis/trans-isomerase, activator of the phosphotyrosyl phosphatase activity of PP2A                      | This study |

(continued)

**TABLE S1****(Continued)**

| ORF       | Gene          | I-C-<br>30° | I-C+<br>30° | I-C+<br>37° | Description                                                                                                                           | Reference  |
|-----------|---------------|-------------|-------------|-------------|---------------------------------------------------------------------------------------------------------------------------------------|------------|
| YHR038W   | <i>RRF1</i>   | +           | W           | S           | Mitochondrial ribosome recycling factor, essential for mitochondrial protein synthesis and respiratory function of mitochondria       | This study |
| YGR056W   | <i>RSC1</i>   | VW          | VW          | S           | One of 15 subunits of the 'Remodel the Structure of Chromatin' (RSC) complex                                                          | This study |
| YLR357W   | <i>RSC2</i>   | VW          | W           | S           | One of 15 subunits of the 'Remodel the Structure of Chromatin' (RSC) complex                                                          | This study |
| YOL067C   | <i>RTG1</i>   | W           | W           | S           | Transcription factor (bHLH) involved in interorganellar communication between mitochondria, peroxisomes, and nucleus                  | This study |
| YDR289C   | <i>RTT103</i> | +           | +           | S           | Protein that interacts with exonuclease Rat1p and Rai1p and plays a role in transcription termination by RNA polymerase II            | This study |
| YOR216C   | <i>RUD3</i>   | VW          | W           | W           | Golgi matrix protein involved in the structural organization of the cis-Golgi; interacts genetically with COG3 and USO1               | This study |
| YDR389W   | <i>SAC7</i>   | W           | W           | S           | GTPase activating protein (GAP) for Rho1p, involved in signaling to the actin cytoskeleton                                            | This study |
| YGL175C   | <i>SAE2</i>   | +           | VW          | S           | Endonuclease that processes hairpin DNA structures with the MRX complex; involved in meiotic and mitotic double-strand break repair   | This study |
| YER129W   | <i>SAK1</i>   | +           | +           | S           | Upstream kinase for the SNF1 complex                                                                                                  | This study |
| YFR040W   | <i>SAP155</i> | +           | +           | S           | Protein that forms a complex with the Sit4p protein phosphatase and is required for its function                                      | This study |
| YDR351W   | <i>SBE2</i>   | +           | +           | W           | Protein involved in the transport of cell wall components from the Golgi to the cell surface                                          | This study |
| YMR214W   | <i>SC71</i>   | +           | +           | S           | One of several homologs of bacterial chaperone DnaJ                                                                                   | This study |
| YBL091C-A | <i>SCS22</i>  | +           | +           | W           | Protein involved in regulation of phospholipid metabolism; homolog of Scs2p                                                           | This study |
| YMR272C   | <i>SCS7</i>   | VW          | W           | VW          | Sphingolipid alpha-hydroxylase, functions in the alpha-hydroxylation of sphingolipid-associated very long chain fatty acids           | This study |
| YBL011W   | <i>SCT1</i>   | VW          | W           | S           | Glycerol 3-phosphate/dihydroxyacetone phosphate dual substrate-specific sn-1 acyltransferase of the glycerolipid biosynthesis pathway | This study |
| YDR469W   | <i>SDC1</i>   | VW          | VW          | W           | Subunit of the COMPASS (Set1C) complex                                                                                                | This study |
| YLR268W   | <i>SEC22</i>  | W           | W           | S           | R-SNARE protein; assembles into SNARE complex with Bet1p, Bos1p and Sed5p; cycles between the ER and Golgi complex                    | This study |
| YLR292C   | <i>SEC72</i>  | +           | +           | S           | Non-essential subunit of Sec63 complex (Sec63p, Sec62p, Sec66p and Sec72p)                                                            | This study |
| YER081W   | <i>SER3</i>   | +           | +           | S           | 3-phosphoglycerate dehydrogenase, catalyzes the first step in serine and glycine biosynthesis; isozyme of Ser33p                      | This study |
| YBL102W   | <i>SFT2</i>   | +           | W           | VW          | Non-essential tetra-spanning membrane protein found mostly in the late Golgi, can suppress some sed5 alleles                          | This study |
| YGL066W   | <i>SGF73</i>  | W           | W           | S           | Subunit of SAGA histone acetyltransferase complex                                                                                     | This study |
| YMR190C   | <i>SGS1</i>   | +           | VW          | W           | Nucleolar DNA helicase of the RecQ family involved in maintenance of genome integrity                                                 | This study |
| YER118C   | <i>SHO1</i>   | +           | +           | W           | Transmembrane osmosensor, participates in activation of both the filamentous growth pathway and the HOG pathway                       | This study |

*(continued)*

**TABLE S1**  
(Continued)

| ORF     | Gene        | I-C-<br>30° | I-C+<br>30° | I-C+<br>37° | Description                                                                                                                                        | Reference  |
|---------|-------------|-------------|-------------|-------------|----------------------------------------------------------------------------------------------------------------------------------------------------|------------|
| YBL058W | <i>SHP1</i> | +           | +           | W           | UBX (ubiquitin regulatory X) domain-containing protein that regulates Glc7p phosphatase activity and interacts with Cdc48p                         | This study |
| YOL110W | <i>SHR5</i> | +           | +           | S           | Subunit of a palmitoyltransferase, composed of Shr5p and Erf2p, that adds a palmitoyl lipid moiety to Ras2p                                        | This study |
| YLR079W | <i>SIC1</i> | +           | W           | S           | Inhibitor of Cdc28-Clb kinase complexes that controls G1/S phase transition, preventing premature S phase                                          | This study |
| YNL236W | <i>SLN4</i> | S           | S           | NG          | Subunit of the Mediator complex; interacts with the RNA polymerase II holoenzyme                                                                   | This study |
| YDR422C | <i>SIP1</i> | +           | +           | W           | Alternate beta-subunit of the Snf1p kinase complex, may confer substrate specificity                                                               | This study |
| YHR206W | <i>SKN7</i> | +           | +           | S           | Transcription factor required for induction of heat-shock genes; involved in osmoregulation; associates with and stabilizes Crz1p                  | This study |
| YBL061C | <i>SKT5</i> | +           | +           | W           | Activator of Chs3p (chitin synthase III), recruits Chs3p to the bud neck via interaction with Bni4p                                                | This study |
| YOR008C | <i>SLG1</i> | VW          | W           | S           | Sensor-transducer to activate the PKC-CWI signaling pathway                                                                                        | This study |
| YIL105C | <i>SLM1</i> | +           | +           | S           | Phosphoinositide PI(4,5)P <sub>2</sub> binding protein, forms a complex with Slm2p; acts downstream of Mss4p; effector of the TORC2 complex        | This study |
| YDL033C | <i>SLM3</i> | +           | +           | W           | tRNA-specific 2-thiouridylyase, responsible for 2-thiolation of the wobble base of mitochondrial tRNAs                                             | This study |
| YBR077C | <i>SLM4</i> | +           | +           | W           | Component of the EGO complex, which is involved in the regulation of microautophagy; required for sorting of Gap1p                                 | This study |
| YER116C | <i>SLX8</i> | W           | W           | S           | Protein that forms a complex with Hex3p; possible role in resolving recombination intermediates during DNA replication or repair                   | This study |
| YOL122C | <i>SMF1</i> | +           | +           | W           | Divalent metal ion transporter with a broad specificity for di-valent and tri-valent metals                                                        | This study |
| YGR229C | <i>SMI1</i> | +           | +           | S           | Protein involved in the regulation of cell wall synthesis; proposed to be involved in coordinating cell cycle progression with cell wall integrity | This study |
| YKL079W | <i>SMY1</i> | +           | +           | S           | Protein that interacts with Myo2p, proposed to be involved in exocytosis                                                                           | This study |
| YJL151C | <i>SN43</i> | +           | +           | S           | Integral membrane protein localized to vacuolar intraluminal vesicles                                                                              | This study |
| YDL194W | <i>SNF3</i> | +           | +           | W           | Plasma membrane glucose sensor that regulates glucose transport; required for low glucose induction of Hxt2p and Hxt4p                             | This study |
| YGL127C | <i>SOH1</i> | VW          | W           | S           | Subunit of the RNA polymerase II mediator complex                                                                                                  | This study |
| YMR016C | <i>SOK2</i> | +           | +           | S           | Nuclear protein that plays a regulatory role in the cyclic AMP (cAMP)-PKA signal transduction pathway                                              | This study |
| YJL192C | <i>SOP4</i> | +           | +           | S           | ER-membrane protein; suppressor of pma1-7, deletion of SOP4 slows down the export of wild-type Pma1p and Pma1-7 from the ER                        | This study |
| YLL021W | <i>SPA2</i> | +           | +           | S           | Component of the polarisome; acts as a scaffold for Mkk1p and Mpk1p cell wall integrity signaling components                                       | This study |

(continued)

**TABLE S1**  
**(Continued)**

| ORF     | Gene         | I-C-<br>30° | I-C+<br>30° | I-C+<br>37° | Description                                                                                                                     | Reference  |
|---------|--------------|-------------|-------------|-------------|---------------------------------------------------------------------------------------------------------------------------------|------------|
| YML055W | <i>SPC2</i>  | +           | +           | W           | Subunit of signal peptidase complex (Spc1p, Spc2p, Spc3p, Sec11p), which cleavage of proteins targeted to the secretory pathway | This study |
| YKL184W | <i>SPE1</i>  | +           | VW          | S           | Ornithine decarboxylase, catalyzes the first step in polyamine biosynthesis                                                     | This study |
| YOL052C | <i>SPE2</i>  | W           | VW          | VW          | S-adenosylmethionine decarboxylase, required for the biosynthesis of spermidine and spermine                                    | This study |
| YEL031W | <i>SPF1</i>  | W           | W           | S           | P-type ATPase, ion transporter of the ER membrane involved in ER function and Ca <sup>2+</sup> homeostasis                      | This study |
| YER150W | <i>SPI1</i>  | +           | +           | W           | GPI-anchored, serine/threonine rich cell wall protein of unknown function; basal expression requires Msn2p/Msn4p                | This study |
| YPL138C | <i>SPP1</i>  | +           | +           | S           | Subunit of COMPASS (Set1C), complex                                                                                             | This study |
| YDR392W | <i>SPT3</i>  | VW          | W           | S           | Subunit of the SAGA and SAGA-like transcriptional regulatory complexes, interacts with Spt15p                                   | This study |
| YGR063C | <i>SPT4</i>  | W           | W           | S           | Protein that forms a complex with Spt5p and mediates both activation and inhibition of transcription elongation                 | This study |
| YLR055C | <i>SPT8</i>  | +           | +           | S           | Subunit of the SAGA transcriptional regulatory complex but not present in SAGA-like complex<br>SLIK/SALSA                       | This study |
| YML034W | <i>SRC1</i>  | W           | W           | S           | Inner nuclear membrane protein with a putative role in sister chromatid segregation                                             | This study |
| YHR178W | <i>STB5</i>  | S           | S           | S           | Activator of multidrug resistance genes, forms a heterodimer with Pdr1p                                                         | This study |
| YCL032W | <i>STE50</i> | +           | +           | S           | Protein involved in invasive/filamentous growth, and osmotolerance, acts as an adaptor linking Cdc42p-Ste20p complex to Ste11p  | This study |
| YLR150W | <i>STM1</i>  | +           | +           | S           | Protein that binds G4 quadruplex and purine motif triplex nucleic acid                                                          | This study |
| YDL048C | <i>STP4</i>  | +           | +           | S           | Protein containing a Kruppel-type zinc-finger domain                                                                            | This study |
| YDR297W | <i>SUR2</i>  | +           | +           | W           | Sphinganine C4-hydroxylase, catalyses the conversion of sphinganine to phytosphingosine in sphingolipid biosynthesis            | This study |
| YDR346C | <i>SVF1</i>  | +           | +           | S           | Protein with a potential role in cell survival pathways, required for the diauxic growth shift                                  | This study |
| YAR003W | <i>SWD1</i>  | +           | +           | S           | Subunit of the COMPASS (Set1C) complex                                                                                          | This study |
| YBR175W | <i>SWD3</i>  | VW          | +           | S           | Subunit of the COMPASS (Set1C) complex                                                                                          | This study |
| YDR260C | <i>SWM1</i>  | +           | +           | S           | Subunit of the anaphase-promoting complex, which is an E3 ubiquitin ligase that regulates exit from mitosis                     | This study |
| YDR395W | <i>SXM1</i>  | +           | +           | S           | Nuclear transport factor (karyopherin) involved in protein transport between the cytoplasm and nucleoplasm                      | This study |
| YLR354C | <i>TAL1</i>  | +           | +           | W           | Transaldolase, enzyme in the non-oxidative pentose phosphate pathway                                                            | This study |
| YEL048C | <i>TCA17</i> | +           | +           | S           | TRAPP Complex Associated protein 17 kDa                                                                                         | This study |
| YDL185W | <i>TFP1</i>  | W           | S           | S           | Vacuolar ATPase V1 domain subunit A containing the catalytic nucleotide binding sites                                           | This study |
| YPL157W | <i>TGS1</i>  | +           | +           | W           | Trimethyl guanosine synthase, responsible for conversion of the m(7)G cap structure of snRNAs and snoRNAs to m(2,2,7)G          | This study |

(continued)

**TABLE S1**  
(Continued)

| ORF       | Gene           | I-C-<br>30° | I-C+<br>30° | I-C+<br>37° | Description                                                                                                                          | Reference  |
|-----------|----------------|-------------|-------------|-------------|--------------------------------------------------------------------------------------------------------------------------------------|------------|
| YLR237W   | <i>THI7</i>    | +           | +           | W           | Plasma membrane transporter responsible for the uptake of thiamine, member of the major facilitator superfamily of transporters      | This study |
| YGR162W   | <i>TIF4631</i> | W           | W           | W           | Translation initiation factor eIF4G, subunit of the mRNA cap-binding protein complex (eIF4F) that also contains eIF4E (Cdc33p)       | This study |
| YGL049C   | <i>TIF4632</i> | +           | +           | S           | Translation initiation factor eIF4G, subunit of the mRNA cap-binding protein complex (eIF4F) that also contains eIF4E (Cdc33p)       | This study |
| YOL018C   | <i>TLG2</i>    | VW          | VW          | VW          | Syntaxin-like t-SNARE that forms a complex with Tlg1p and Vti1p and mediates fusion of endosome-derived vesicles with the late Golgi | This study |
| YKL056C   | <i>TMA19</i>   | +           | +           | S           | Protein that associates with ribosomes; homolog of translationally controlled tumor protein                                          | This study |
| YER007C-A | <i>TMA20</i>   | VW          | VW          | W           | Protein of unknown function that associates with ribosomes and has a putative RNA binding domain                                     | This study |
| YJR066W   | <i>TOR1</i>    | +           | +           | S           | PIK-related protein kinase and rapamycin target; subunit of TORC1, a complex that controls growth in response to nutrients           | This study |
| YGL179C   | <i>TOS3</i>    | +           | +           | S           | Protein kinase, related to and functionally redundant with Elm1p and Sak1p for the phosphorylation and activation of Snf1p           | This study |
| YNL079C   | <i>TPM1</i>    | W           | W           | S           | Major isoform of tropomyosin; acetylated by the NatB complex                                                                         | This study |
| YBR126C   | <i>TPS1</i>    | W           | W           | NG          | Synthase subunit of trehalose-6-phosphate synthase/phosphatase complex, which synthesizes the storage carbohydrate trehalose         | This study |
| YDR074W   | <i>TPS2</i>    | +           | +           | S           | Phosphatase subunit of the trehalose-6-phosphate synthase/phosphatase complex, which synthesizes trehalose                           | This study |
| YOL093W   | <i>TRM10</i>   | +           | +           | S           | tRNA methyltransferase, methylates the N-1 position of guanosine in tRNAs                                                            | This study |
| YOL124C   | <i>TRM11</i>   | +           | +           | W           | Catalytic subunit of an adoMet-dependent tRNA methyltransferase complex (Trm11p-Trm112p)                                             | This study |
| YDL201W   | <i>TRM8</i>    | +           | +           | S           | Subunit of a tRNA methyltransferase complex composed of Trm8p and Trm82p that catalyzes 7-methylguanosine modification of tRNA       | This study |
| YML014W   | <i>TRM9</i>    | VW          | VW          | S           | tRNA methyltransferase, catalyzes the esterification of modified uridine nucleotides in tRNAs                                        | This study |
| YDR354W   | <i>TRP4</i>    | +           | +           | W           | Anthranilate phosphoribosyl transferase of the tryptophan biosynthetic pathway                                                       | This study |
| YML028W   | <i>TSA1</i>    | +           | +           | S           | Ubiquitous housekeeping thioredoxin peroxidase                                                                                       | This study |
| YHR111W   | <i>UBA4</i>    | S           | S           | S           | Protein that activates Urm1p before its conjugation to proteins (urmylation)                                                         | This study |
| YLL039C   | <i>UBI4</i>    | +           | +           | S           | Ubiquitin, becomes conjugated to proteins, marking them for selective degradation via the ubiquitin-26S proteasome system            | This study |
| YBR058C   | <i>UBP14</i>   | +           | VW          | S           | Ubiquitin-specific protease that specifically disassembles unanchored ubiquitin chains                                               | This study |
| YMR304W   | <i>UBP15</i>   | +           | +           | W           | Ubiquitin-specific protease that may play a role in ubiquitin precursor processing                                                   | This study |

(continued)

**TABLE S1**  
**(Continued)**

| ORF     | Gene         | I-C-<br>30° | I-C+<br>30° | I-C+<br>37° | Description                                                                                                                                 | Reference  |
|---------|--------------|-------------|-------------|-------------|---------------------------------------------------------------------------------------------------------------------------------------------|------------|
| YFR010W | <i>UBP6</i>  | W           | W           | S           | Ubiquitin-specific protease in the subcomplex of the 26S proteasome, releases free ubiquitin from branched polyubiquitin chains             | This study |
| YML013W | <i>UBX2</i>  | VW          | VW          | S           | Protein involved in ER-associated protein degradation; proposed to coordinate the assembly of proteins involved in ERAD                     | This study |
| YMR067C | <i>UBX4</i>  | +           | +           | S           | UBX (ubiquitin regulatory X) domain-containing protein that interacts with Cdc48p                                                           | This study |
| YDL190C | <i>UFD2</i>  | +           | +           | S           | Ubiquitin chain assembly factor (E4) that cooperates with enzymes (E1), (E2), (E3) to conjugate ubiquitin to substrates                     | This study |
| YNL229C | <i>URE2</i>  | W           | W           | S           | Nitrogen catabolite repression regulator that acts by inhibition of GLN3 transcription in good nitrogen source                              | This study |
| YDR400W | <i>URH1</i>  | +           | +           | VW          | Uridine nucleosidase (uridine-cytidine N-ribohydrolase), cleaves N-glycosidic bonds in nucleosides                                          | This study |
| YEL040W | <i>UTR2</i>  | +           | +           | W           | Cell wall protein that functions in the transfer of chitin to beta(1-6)glucan; GPI-anchored protein localized to the bud neck               | This study |
| YEL013W | <i>VAC8</i>  | +           | +           | S           | Phosphorylated vacuolar membrane protein that interacts with Atg13p, required for the cytoplasm-to-vacuole targeting (Cvt) pathway          | This study |
| YOR106W | <i>VAM3</i>  | +           | +           | S           | Protein required for vacuolar assembly; functions with Vam7p in vacuolar protein trafficking                                                | This study |
| YDL077C | <i>VAM6</i>  | +           | +           | W           | Vacuolar protein; plays a role in vacuolar membrane fusion as GEF of the Ypt7p and it is also a GEF of Gtr1p in the EGO complex             | This study |
| YML115C | <i>VAN1</i>  | W           | W           | W           | Component of the mannan polymerase I; forms a complex with Mnn9p, which is involved in mannan synthesis                                     | This study |
| YLR373C | <i>VID22</i> | VW          | VW          | VW          | Glycosylated membrane protein; plays a role in fructose-1,6-bisphosphatase (FBPase) degradation and transport                               | This study |
| YIL017C | <i>VID28</i> | +           | +           | S           | Protein involved in proteasome-dependent degradation of fructose-1,6-bisphosphatase (FBPase)                                                | This study |
| YPR036W | <i>VMA13</i> | S           | S           | S           | Subunit H of the eight-subunit V1 peripheral membrane domain of the vacuolar H <sup>+</sup> -ATPase (V-ATPase)                              | This study |
| YBR127C | <i>VMA2</i>  | S           | S           | S           | Subunit B of the eight-subunit V1 peripheral membrane domain of the vacuolar H <sup>+</sup> -ATPase (V-ATPase)                              | This study |
| YGR105W | <i>VMA21</i> | VW          | W           | S           | Integral membrane protein that is required for vacuolar H <sup>+</sup> -ATPase (V-ATPase) function; not a component of the V-ATPase complex | This study |
| YHR060W | <i>VMA22</i> | W           | W           | S           | Integral membrane protein that is required for vacuolar H <sup>+</sup> -ATPase (V-ATPase) function; not a component of the V-ATPase complex | This study |
| YGR020C | <i>VMA7</i>  | VW          | W           | S           | Subunit F of the eight-subunit V1 peripheral membrane domain of vacuolar H <sup>+</sup> -ATPase (V-ATPase)                                  | This study |

(continued)

**TABLE S1**  
**(Continued)**

| ORF     | Gene           | I-C-<br>30° | I-C+<br>30° | I-C+<br>37° | Description                                                                                                                                 | Reference  |
|---------|----------------|-------------|-------------|-------------|---------------------------------------------------------------------------------------------------------------------------------------------|------------|
| YEL051W | <i>VMA8</i>    | S           | S           | S           | Subunit D of the eight-subunit V1 peripheral membrane domain of the vacuolar H <sup>+</sup> -ATPase (V-ATPase)                              | This study |
| YOR270C | <i>VPH1</i>    | +           | +           | W           | Subunit of vacuolar-ATPase V0 domain, one of two isoforms (Vph1p and Stv1p); Vph1p is located in V-ATPase complexes of the vacuole          | This study |
| YKL119C | <i>VPH2</i>    | W           | S           | S           | Integral membrane protein that is required for vacuolar H <sup>+</sup> -ATPase (V-ATPase) function; not a component of the V-ATPase complex | This study |
| YPL065W | <i>VPS28</i>   | +           | +           | S           | Component of the ESCRT-I complex, which is involved in ubiquitin-dependent sorting of proteins into the endosome                            | This study |
| YDR080W | <i>VPS41</i>   | +           | VW          | W           | Vacuolar membrane protein that is a subunit of the homotypic vacuole fusion and vacuole protein sorting (HOPS) complex                      | This study |
| YDR486C | <i>VPS60</i>   | +           | +           | S           | Cytoplasmic and vacuolar membrane protein involved in late endosome to vacuole transport                                                    | This study |
| YDR200C | <i>VPS64</i>   | +           | +           | S           | Cytoplasmic protein required for cytoplasm to vacuole targeting of proteins                                                                 | This study |
| YPR139C | <i>VPS66</i>   | +           | W           | S           | Cytoplasmic protein of unknown function involved in vacuolar protein sorting.                                                               | This study |
| YOR359W | <i>VTS1</i>    | VW          | VW          | S           | Protein of unknown function, shows genetic interactions with Vti1p, which is a v-SNARE involved in cis-Golgi membrane traffic               | This study |
| YGR241C | <i>YAP1802</i> | +           | +           | W           | Protein involved in clathrin cage assembly                                                                                                  | This study |
| YGL060W | <i>YBP2</i>    | +           | +           | W           | Protein with a role in resistance to oxidative stress                                                                                       | This study |
| YEL004W | <i>YEA4</i>    | +           | +           | W           | Uridine diphosphate-N-acetylglucosamine (UDP-GlcNAc) transporter required for cell wall chitin synthesis                                    | This study |
| YEL041W | <i>YEF1</i>    | +           | +           | S           | ATP-NADH kinase; phosphorylates both NAD and NADH;                                                                                          | This study |
| YDR057W | <i>YOS9</i>    | +           | +           | W           | Lectin; soluble luminal ER protein; serves as a receptor that recognizes misfolded N-glycosylated proteins targeted to ERAD                 | This study |
| YBR183W | <i>YPC1</i>    | VW          | +           | W           | Alkaline ceramidase that also has reverse (CoA-independent) ceramide synthase activity                                                      | This study |
| YMR104C | <i>YPK2</i>    | W           | W           | W           | Protein kinase with similarity to Ser/Thr protein kinase Ypk1p; functionally redundant with YPK1                                            | This study |
| YDR368W | <i>YPR1</i>    | +           | +           | W           | NADP <sup>+</sup> -dependant glycerol dehydrogenase                                                                                         | This study |
| YLR262C | <i>YPT6</i>    | +           | +           | VW          | GTPase, Ras-like GTP binding protein, required for fusion of endosome-derived vesicles with the late Golgi                                  | This study |
| YOL109W | <i>ZE01</i>    | +           | +           | S           | Peripheral membrane protein of the plasma membrane that interacts with Mid2p and mediates the PKC-CWI signaling pathway                     | This study |
| YCL033C | <i>YCL033C</i> | +           | +           | S           | Putative protein-methionine-R-oxide reductase; involved in response to oxidative stress                                                     | This study |
| YCR045C | <i>YCR045C</i> | +           | +           | W           | Putative protein of unknown function                                                                                                        | This study |
| YCR076C | <i>YCR076C</i> | +           | +           | W           | Putative protein of unknown function; is not an essential gene                                                                              | This study |
| YDL073W | <i>YDL073W</i> | +           | +           | S           | Putative protein of unknown function; is not an essential gene                                                                              | This study |

(continued)



**TABLE S1**  
**(Continued)**

| ORF     | Gene           | I-C-<br>30° | I-C+<br>30° | I-C+<br>37° | Description                                                                                                                         | Reference                    |
|---------|----------------|-------------|-------------|-------------|-------------------------------------------------------------------------------------------------------------------------------------|------------------------------|
| YDR049W | <i>YDR049W</i> | VW          | W           | S           | Zinc finger protein; putative transcription factor that may interact with proteins involved in histone acetylation or deacetylation | This study                   |
| YDR266C | <i>YDR266C</i> | +           | +           | W           | Protein of unknown function that may interact with ribosomes, based on co-purification experiments                                  | This study                   |
| YDR348C | <i>YDR348C</i> | +           | +           | S           | Protein of unknown function                                                                                                         | This study                   |
| YER152C | <i>YER152C</i> | +           | VW          | S           | Putative protein of unknown function; is not an essential gene                                                                      | This study                   |
| YGR250C | <i>YGR250C</i> | +           | +           | W           | Putative protein of unknown function                                                                                                | This study                   |
| YHR162W | <i>YHR162W</i> | +           | VW          | W           | Putative protein of unknown function                                                                                                | This study                   |
| YIL029C | <i>YIL029C</i> | +           | +           | S           | Putative protein of unknown function                                                                                                | This study                   |
| YIL077C | <i>YIL077C</i> | +           | +           | W           | Putative protein of unknown function                                                                                                | This study                   |
| YJL193W | <i>YJL193W</i> | +           | +           | S           | Putative protein of unknown function; deletion mutant has a respiratory growth defect                                               | This study                   |
| YKL027W | <i>YKL027W</i> | +           | +           | S           | Protein of unknown function                                                                                                         | This study                   |
| YKL077W | <i>YKL077W</i> | VW          | W           | S           | Putative protein of unknown function                                                                                                | This study                   |
| YKR070W | <i>YKR070W</i> | +           | +           | W           | Putative protein of unknown function                                                                                                | This study                   |
| YLR199C | <i>YLR199C</i> | +           | +           | S           | Putative protein of unknown function                                                                                                | This study                   |
| YLR426W | <i>YLR426W</i> | +           | W           | S           | Putative protein of unknown                                                                                                         | This study                   |
| YMR010W | <i>YMR010W</i> | +           | W           | S           | Putative protein of unknown function                                                                                                | This study                   |
| YMR099C | <i>YMR099C</i> | +           | +           | W           | Protein of unknown function with similarity to aldose 1-epimerase                                                                   | This study                   |
| YOL087C | <i>YOL087C</i> | +           | +           | S           | Putative protein of unknown function                                                                                                | This study                   |
| YOL098C | <i>YOL098C</i> | +           | +           | W           | Putative metalloprotease                                                                                                            | This study                   |
| YOL107W | <i>YOL107W</i> | +           | +           | S           | Putative protein of unknown function; colocalizes with COPI-coated vesicles                                                         | This study                   |
| YOR012W | <i>YOR012W</i> | +           | +           | W           | Putative protein of unknown function                                                                                                | This study                   |
| YOR246C | <i>YOR246C</i> | +           | +           | W           | Protein with similarity to oxidoreductases, found in lipid particles                                                                | This study                   |
| YPL264C | <i>YPL264C</i> | W           | VW          | W           | Putative membrane protein of unknown function                                                                                       | This study                   |
| YOR141C | <i>ARP8</i>    | W           | S           | NG          | Nuclear actin-related protein involved in chromatin remodeling, component of chromatin-remodeling enzyme complexes INO80            | (Shen et al. 2003a)          |
| YJL095W | <i>BCK1</i>    | S           | S           | S           | Mitogen-activated protein (MAP) kinase kinase kinase acting in the protein kinase C signaling pathway                               | (Nunez et al. 2008)          |
| YAL021C | <i>CCR4</i>    | +           | +           | W           | Component of the CCR4-NOT transcriptional complex                                                                                   | (Betz et al. 2002)           |
| YDR069C | <i>DOA4</i>    | S           | S           | NG          | Ubiquitin hydrolase, required for recycling ubiquitin; acts at the proteasome, late endosome/prevacuolar compartment                | (Henry and Patton-Vogt 1998) |
| YFL031W | <i>HAC1</i>    | S           | S           | S           | Transcription factor that regulates the unfolded protein response, via UPRE binding; spliced by Ire1p upon ER stress                | (Nikawa et al. 1996)         |
| YGL194C | <i>HOS2</i>    | W           | W           | S           | Histone deacetylase; subunit of the Set3 complex, a meiotic-specific repressor of sporulation specific genes                        | (Cohen et al. 2008)          |

(continued)

**TABLE S1****(Continued)**

| ORF     | Gene        | I-C-<br>30° | I-C+<br>30° | I-C+<br>37° | Description                                                                                                                               | Reference                      |
|---------|-------------|-------------|-------------|-------------|-------------------------------------------------------------------------------------------------------------------------------------------|--------------------------------|
| YEL044W | <i>IES6</i> | S           | S           | NG          | Protein that associates with the INO80 chromatin remodeling complex under low-salt conditions                                             | (Fernandez-Murray et al. 2009) |
| YJL153C | <i>INO1</i> | S           | S           | S           | Inositol 1-phosphate synthase, involved in synthesis of inositol phosphates and inositol-containing phospholipids                         | (Culbertson and Henry 1975)    |
| YDR123C | <i>INO2</i> | S           | S           | S           | Component of the Ino2p/Ino4p basic helix-loop-helix transcription activator that binds inositol/choline-responsive elements (ICREs)       | (Donahue and Henry 1981)       |
| YOL108C | <i>INO4</i> | S           | S           | S           | Component of the Ino2p/Ino4p basic helix-loop-helix transcription activator that binds inositol/choline-responsive elements (ICREs)       | (Donahue and Henry 1981)       |
| YHR079C | <i>IRE1</i> | S           | S           | S           | Ser/Thr kinase and endoribonuclease; transmembrane protein that initiates the unfolded protein response mediates HAC1 mRNA splicing       | (Nikawa and Yamashita 1992)    |
| YML059C | <i>NTE1</i> | +           | W           | S           | Serine esterase that deacylates exogenous lysophospholipids, homolog of human neuropathy target esterase (NTE)                            | (Nunez et al. 2008)            |
| YBR279W | <i>PAF1</i> | S           | S           | NG          | RNA polymerase II-associated protein, defines the Paf1 complex that is biochemically and functionally distinct from the Srb-Mediator      | (Betz et al. 2002)             |
| YLR039C | <i>RIC1</i> | VW          | W           | NG          | Protein involved in retrograde transport to TGN; forms heterodimer with Rgp1p that acts as a GTP exchange factor for Ypt6p                | (Kodaki et al. 1995)           |
| YJL140W | <i>RPB4</i> | S           | S           | NG          | RNA polymerase II subunit B32; forms two subunit dissociable complex with Rpb7p                                                           | (Woychik and Young 1989)       |
| YGL244W | <i>RTF1</i> | VW          | W           | S           | Subunit of the RNA polymerase II-associated Paf1 complex                                                                                  | (Betz et al. 2002)             |
| YKL212W | <i>SAC1</i> | S           | S           | S           | Lipid phosphoinositide phosphatase of the ER and Golgi, involved in protein trafficking and secretion                                     | (Whitters et al. 1993)         |
| YER120W | <i>SCS2</i> | W           | W           | S           | Integral ER membrane protein; regulates phospholipid metabolism via an interaction with the FFAT motif of Opi1p                           | (Kagiwada et al. 1998)         |
| YGL126W | <i>SCS3</i> | VW          | S           | S           | Protein required for inositol prototrophy, appears to be involved in the synthesis of inositol phospholipids from inositol                | (Hosaka et al. 1994)           |
| YKR029C | <i>SET3</i> | +           | W           | S           | Defining member of the SET3 histone deacetylase complex which is a meiosis-specific repressor of sporulation genes                        | (Cohen et al. 2008)            |
| YBR103W | <i>SIF2</i> | W           | W           | S           | WD40 repeat-containing subunit of the Set3C histone deacetylase complex, which represses early/middle sporulation genes                   | (Cohen et al. 2008)            |
| YHR030C | <i>SLT2</i> | VW          | S           | S           | Ser/Thr MAP kinase involved in cell wall integrity and progression through the cell cycle; part of the protein kinase C signaling pathway | (Nunez et al. 2008)            |
| YDR477W | <i>SNF1</i> | W           | W           | S           | AMP-activated Ser/Thr kinase; forms a complex with Snf4p and members of the Sip1p/Sip2p/Gal83p family                                     | (Hirschhorn et al. 1992)       |
| YOR290C | <i>SNF2</i> | +           | VW          | VW          | Catalytic subunit of the SWI/SNF chromatin remodeling complex involved in transcriptional regulation                                      | (Peterson and Herskowitz 1992) |

*(continued)*

**TABLE S1**  
(Continued)

| ORF     | Gene                     | I-C-<br>30° | I-C+<br>30° | I-C+<br>37° | Description                                                                                                                          | Reference                        |
|---------|--------------------------|-------------|-------------|-------------|--------------------------------------------------------------------------------------------------------------------------------------|----------------------------------|
| YGL115W | <i>SNF4</i>              | W           | W           | S           | Protein kinase activator found in a complex containing Snf1p and its beta subunits; activates the Snf1p protein kinase               | (Fernandez-Murray et al. 2009)   |
| YBR289W | <i>SNF5</i>              | S           | S           | S           | Subunit of the SWI/SNF chromatin remodeling complex involved in transcriptional regulation                                           | (Peterson and Herskowitz 1992)   |
| YHL025W | <i>SNF6</i>              | S           | S           | S           | Subunit of the SWI/SNF chromatin remodeling complex involved in transcriptional regulation                                           | (Peterson and Herskowitz 1992)   |
| YCR033W | <i>SNT1</i>              | W           | S           | S           | Subunit of the Set3C deacetylase complex; putative DNA-binding protein                                                               | (Cohen et al. 2008)              |
| YHR041C | <i>SRB2</i>              | S           | S           | S           | Transcription factor, subunit of the RNA polymerase II mediator complex                                                              | (Koleske et al. 1992)            |
| YGR104C | <i>SRB5</i>              | VW          | VW          | NG          | Subunit of the RNA polymerase II mediator complex                                                                                    | (Betz et al. 2002)               |
| YMR039C | <i>SUB1</i>              | W           | W           | S           | Transcriptional coactivator, facilitates elongation, acts in a peroxide resistance pathway involving Rad2p                           | (Knaus et al. 1996)              |
| YJL176C | <i>SWI3</i>              | W           | S           | S           | Subunit of the SWI/SNF chromatin remodeling complex; required for transcription of many genes such as <i>HO</i> and <i>INO1</i>      | (Peterson and Herskowitz 1992)   |
| YKL065C | <i>YET1</i>              | W           | S           | S           | Endoplasmic reticulum transmembrane protein, form a complex with the ER translocation machinery; homolog of human BAP31 protein      | (Wilson and Barlowe 2010)        |
| YDL072C | <i>YET3</i>              | S           | S           | S           | Endoplasmic reticulum transmembrane protein, form a complex with the ER translocation machinery; homolog of human BAP31 protein      | (Wilson and Barlowe 2010)        |
| YNL059C | <i>ARP5<sup>a</sup></i>  | NG          | NG          | NG          | Nuclear actin-related protein involved in chromatin remodeling, component of chromatin-remodeling enzyme complexes                   | (Shen et al. 2003a)              |
| YLR226W | <i>BUR2<sup>a</sup></i>  | +           | +           | +           | Cyclin for the Sgv1p (Bur1p) protein kinase                                                                                          | (Prelich and Winston 1993)       |
| YBR135W | <i>CKS1<sup>a</sup></i>  | NS          | NS          | NS          | Subunit of the Cdc28 protein kinase, required for mitotic proteolysis, may also be involved in the proteolysis of the G1 cyclins     | (Yu and Reed 2004)               |
| YOL145C | <i>CTR9<sup>a</sup></i>  | NS          | NS          | NS          | Component of the Paf1p complex                                                                                                       | (Betz et al. 2002)               |
| YPL254W | <i>HFI1<sup>a</sup></i>  | NG          | NG          | NG          | Adaptor protein required for integrity of the SAGA complex                                                                           | (Horiuchi et al. 1997)           |
| YDR138W | <i>HPR1<sup>a</sup></i>  | NG          | NG          | NG          | Subunit of THO/TREX complexes                                                                                                        | (Betz et al. 2002)               |
| YGL070C | <i>RPB9<sup>a</sup></i>  | NG          | NG          | NG          | RNA polymerase II subunit B12.6                                                                                                      | (Furter-Graves et al. 1994)      |
| YOL148C | <i>SPT20<sup>a</sup></i> | NG          | NG          | NG          | Subunit of the SAGA transcriptional regulatory complex                                                                               | (Roberts and Winston 1996)       |
| YBR081C | <i>SPT7<sup>a</sup></i>  | NS          | NS          | NS          | Subunit of the SAGA transcriptional regulatory complex                                                                               | (Gansheroff et al. 1995)         |
| YGL150C | <i>INO80<sup>a</sup></i> | NS          | NS          | NS          | ATPase that forms a large complex Ino80, containing actin and several actin-related proteins, that has chromatin remodeling activity | (Ebbert et al. 1999)             |
| YNL267W | <i>PIK1<sup>a</sup></i>  | NS          | NS          | NS          | Phosphatidylinositol 4-kinase; catalyzes first step in the biosynthesis of phosphatidylinositol-4,5-biphosphate                      | (Walch-Solimena and Novick 1999) |
| YPR113W | <i>PLS1<sup>a</sup></i>  | NS          | NS          | NS          | Phosphatidylinositol synthase                                                                                                        | (Nikawa et al. 1987)             |
| YBL105C | <i>PKC1<sup>a</sup></i>  | NS          | NS          | NS          | Protein serine/threonine kinase essential for cell wall remodeling during growth                                                     | (Nunez et al. 2008)              |

(continued)

**TABLE S1**  
(Continued)

| ORF       | Gene                            | I-C-<br>30° | I-C+<br>30° | I-C+<br>37° | Description                                                                                                                                                                           | Reference                      |
|-----------|---------------------------------|-------------|-------------|-------------|---------------------------------------------------------------------------------------------------------------------------------------------------------------------------------------|--------------------------------|
| YOR210W   | <u><i>RPB10<sup>a</sup></i></u> | NS          | NS          | NS          | RNA polymerase subunit ABC10-beta, common to RNA polymerases I, II, and III                                                                                                           | (Shpakovski et al. 1995)       |
| YOR151C   | <u><i>RPB2<sup>a</sup></i></u>  | NS          | NS          | NS          | RNA polymerase II second largest subunit B150, part of central core; similar to bacterial beta subunit                                                                                | (Scafe et al. 1990b)           |
| YOR224C   | <u><i>RPB8<sup>a</sup></i></u>  | NS          | NS          | NS          | RNA polymerase subunit ABC14.5, common to RNA polymerases I, II, and III                                                                                                              | (Shpakovski et al. 1995)       |
| YHR143W-A | <u><i>RPC10<sup>a</sup></i></u> | NS          | NS          | NS          | RNA polymerase subunit, found in RNA polymerase complexes I, II, and III                                                                                                              | (Shpakovski et al. 1995)       |
| YDL140C   | <u><i>RPO21<sup>a</sup></i></u> | NS          | NS          | NS          | RNA polymerase II largest subunit B220, part of central core                                                                                                                          | (Nonet and Young 1989)         |
| YPR187W   | <u><i>RPO26<sup>a</sup></i></u> | NS          | NS          | NS          | RNA polymerase subunit ABC23, common to RNA polymerases I, II, and III; part of central core                                                                                          | (Shpakovski et al. 1995)       |
| YLR208W   | <u><i>SEC13<sup>a</sup></i></u> | NS          | NS          | NS          | Component of both the Nup84 nuclear pore sub-complex and of the COPII complex (Sar1p, Sec13p, Sec16p, Sec23p, Sec24p, Sec31p, Sfb2p, and Sfb3p)                                       | (Gilstring et al. 1999)        |
| YMR079W   | <u><i>SEC14<sup>a</sup></i></u> | NS          | NS          | NS          | Phosphatidylinositol/phosphatidylcholine transfer protein; involved in regulating PtdIns, PtdCho, and ceramide metabolism, products of which regulate intracellular transport and UPR | (Kearns et al. 1997)           |
| YPR161C   | <u><i>SGV1<sup>a</sup></i></u>  | NS          | NS          | NS          | Cyclin (Bur2p)-dependent protein kinase that functions in transcriptional regulation                                                                                                  | (Prelich and Winston 1993)     |
| YER148W   | <u><i>SPT15<sup>a</sup></i></u> | NS          | NS          | NS          | TATA-binding protein, general transcription factor that interacts with other factors to form the preinitiation complex at promoters                                                   | (Shirra and Arndt 1999)        |
| YPR086W   | <u><i>SUA7<sup>a</sup></i></u>  | NS          | NS          | NS          | Transcription factor TFIIIB, a general transcription factor required for transcription initiation and start site selection by RNA polymerase II                                       | (Berroteran et al. 1994)       |
| YPL016W   | <u><i>SWI1<sup>a</sup></i></u>  | NS          | NS          | NS          | Subunit of the SWI/SNF chromatin remodeling complex; required for transcription of many genes such as <i>HO</i> and <i>INO1</i>                                                       | (Peterson and Herskowitz 1992) |
| YPR056W   | <u><i>TFB4<sup>a</sup></i></u>  | NS          | NS          | NS          | Subunit of TFIIH complex, involved in transcription initiation                                                                                                                        | (Feaver et al. 1999)           |
| YDR050C   | <u><i>TPI1<sup>a</sup></i></u>  | NS          | NS          | NS          | Triose phosphate isomerase                                                                                                                                                            | (Shi et al. 2005)              |
| YHR099W   | <u><i>TRA1<sup>a</sup></i></u>  | NS          | NS          | NS          | Subunit of SAGA and NuA4 histone acetyltransferase complexes                                                                                                                          | (Mutiu et al. 2007)            |
| YJL087C   | <u><i>TRL1<sup>a</sup></i></u>  | NS          | NS          | NS          | tRNA ligase, required for tRNA splicing                                                                                                                                               | (Sidrauski et al. 1996)        |

Phenotypes were scored as follows: mutants that grew well on I<sup>+</sup>C<sup>-</sup> medium at a given temperature, but whose growth was visibly weaker on either I<sup>-</sup>C<sup>-</sup> or I<sup>-</sup>C<sup>+</sup> media, were scored as very weak (VW). Mutants exhibiting very reduced but still detectable growth in I<sup>-</sup>C<sup>-</sup> or I<sup>-</sup>C<sup>+</sup> media were scored as weak (W). Mutants exhibiting no visible growth on I<sup>-</sup>C<sup>-</sup> or I<sup>-</sup>C<sup>+</sup> media were scored as strong (S) (See Figure 1). A score of “+” indicates no growth reduction in any inositol lacking media, and compared to growth on I<sup>+</sup>C<sup>-</sup> and I<sup>+</sup>C<sup>+</sup> medium at the corresponding temperature. A score of “NS” (Not Screened) indicates that the mutant conferring the Ino<sup>-</sup> phenotype was not present in the homozygous diploid strain collection. A score of “NG” (No Growth) indicates that the deletion mutant from the homozygous diploid collection failed to grow in either synthetic I<sup>+</sup>C<sup>+</sup>, I<sup>+</sup>C<sup>-</sup>, and/or YPD medium at a given temperature. Underlined gene names indicate deletions of essential genes for which conditional alleles have been reported to confer an Ino<sup>-</sup> phenotype. References are provided for those mutations previously shown to confer an Ino<sup>-</sup> phenotype.

<sup>a</sup> Mutations previously shown to confer an Ino<sup>-</sup> phenotype that were not confirmed in this study.

### Supplementary References

- Berroteran RW, Ware DE, Hampsey M (1994) The *sua8* suppressors of *Saccharomyces cerevisiae* encode replacements of conserved residues within the largest subunit of RNA polymerase II and affect transcription start site selection similarly to *sua7* (TFIIB) mutations. *Mol Cell Biol* 14 (1):226-237
- Betz JL, Chang M, Washburn TM, Porter SE, Mueller CL, Jaehning JA (2002) Phenotypic analysis of Paf1/RNA polymerase II complex mutations reveals connections to cell cycle regulation, protein synthesis, and lipid and nucleic acid metabolism. *Mol Genet Genomics* 268 (2):272-285
- Cohen TJ, Mallory MJ, Strich R, Yao TP (2008) Hos2p/Set3p deacetylase complex signals secretory stress through the Mpk1p cell integrity pathway. *Eukaryot Cell* 7 (7):1191-1199
- Culbertson MR, Henry SA (1975) Inositol-requiring mutants of *Saccharomyces cerevisiae*. *Genetics* 80:23-40
- Donahue TF, Henry SA (1981) Inositol Mutants of *Saccharomyces cerevisiae*: Mapping the *ino1* Locus and Characterizing Alleles of the *ino1*, *ino2* and *ino4* Loci. *Genetics* 98:491-503
- Ebbert R, Birkmann A, Schuller HJ (1999) The product of the *SNF2/SWI2* paralogue *INO80* of *Saccharomyces cerevisiae* required for efficient expression of various yeast structural genes is part of a high-molecular-weight protein complex. *Mol Microbiol* 32 (4):741-751
- Feaver WJ, Huang W, Friedberg EC (1999) The TFB4 subunit of yeast TFIIF is required for both nucleotide excision repair and RNA polymerase II transcription. *J Biol Chem* 274 (41):29564-29567
- Fernandez-Murray JP, Gaspard GJ, Jesch SA, McMaster CR (2009) *NTE1*-encoded phosphatidylcholine phospholipase b regulates transcription of phospholipid biosynthetic genes. *J Biol Chem* 284 (52):36034-36046
- Furter-Graves EM, Hall BD, Furter R (1994) Role of a small RNA pol II subunit in TATA to transcription start site spacing. *Nucleic Acids Res* 22 (23):4932-4936
- Gansheroff LJ, Dollard C, Tan P, Winston F (1995) The *Saccharomyces cerevisiae SPT7* gene encodes a very acidic protein important for transcription in vivo. *Genetics* 139 (2):523-536
- Gilstring CF, Melin-Larsson M, Ljungdahl PO (1999) Shr3p mediates specific COPII coatomer-cargo interactions required for the packaging of amino acid permeases into ER-derived transport vesicles. *Mol Biol Cell* 10 (11):3549-3565
- Henry SA, Patton-Vogt JL (1998) Genetic regulation of phospholipid metabolism: yeast as a model eukaryote. *Prog Nucleic Acid Res Mol Biol* 61:133-179
- Hirschhorn JN, Brown SA, Clark CD, Winston F (1992) Evidence that *SNF2/SWI2* and *SNF5* activate transcription in yeast by altering chromatin structure. *Genes Dev* 6 (12A):2288-2298
- Horiuchi J, Silverman N, Pina B, Marcus GA, Guarente L (1997) ADA1, a novel component of the ADA/GCN5 complex, has broader effects than GCN5, ADA2, or ADA3. *Mol Cell Biol* 17 (6):3220-3228
- Hosaka K, Nikawa J, Kodaki T, Ishizu H, Yamashita S (1994) Cloning and sequence of the *SCS3* gene which is required for inositol prototrophy in *Saccharomyces cerevisiae*. *J Biochem* 116 (6):1317-1321
- Kagiwada S, Hosaka K, Murata M, Nikawa J, Takatsuki A (1998) The *Saccharomyces cerevisiae SCS2* gene product, a homolog of a synaptobrevin-associated protein, is an integral membrane protein of the endoplasmic reticulum and is required for inositol metabolism. *J Bacteriol* 180 (7):1700-1708
- Kearns BG, McGee TP, Mayinger P, Gedvilaite A, Phillips SE, Kagiwada S, Bankaitis VA (1997) Essential role for diacylglycerol in protein transport from the yeast Golgi complex. *Nature* 387 (6628):101-105
- Knaus R, Pollock R, Guarente L (1996) Yeast SUB1 is a suppressor of TFIIB mutations and has homology to the human co-activator PC4. *Embo J* 15 (8):1933-1940
- Kodaki T, Hosaka K, Nikawa J, Yamashita S (1995) The *SNF2/SWI2/GAM1/TYE3/RIC1* gene is involved in the coordinate regulation of phospholipid synthesis in *Saccharomyces cerevisiae*. *J Biochem* 117 (2):362-368
- Koleske AJ, Buratowski S, Nonet M, Young RA (1992) A novel transcription factor reveals a functional link between the RNA polymerase II CTD and TFIID. *Cell* 69 (5):883-894
- Mutiú AI, Hoke SM, Genereaux J, Hannam C, MacKenzie K, Jobin-Robitaille O, Guzzo J, Cote J, Andrews B, Haniford DB, Brandl CJ (2007) Structure/function analysis of the phosphatidylinositol-3-kinase domain of yeast Tra1. *Genetics* 177 (1):151-166
- Nikawa J, Akiyoshi M, Hirata S, Fukuda T (1996) *Saccharomyces cerevisiae IRE2/HAC1* is involved in IRE1-mediated KAR2 expression. *Nucleic Acids Res* 24 (21):4222-4226
- Nikawa J, Kodaki T, Yamashita S (1987) Primary structure and disruption of the phosphatidylinositol synthase gene of *Saccharomyces cerevisiae*. *J Biol Chem* 262 (10):4876-4881
- Nikawa J-I, Yamashita S (1992) *IRE1* encodes a putative protein kinase containing a membrane-spanning domain and is required for inositol prototrophy in *Saccharomyces cerevisiae*. *Mol Microbiol* 6:1441-1446

- Nonet ML, Young RA (1989) Intragenic and extragenic suppressors of mutations in the heptapeptide repeat domain of *Saccharomyces cerevisiae* RNA polymerase II. *Genetics* 123 (4):715-724
- Nunez LR, Jesch SA, Gaspar ML, Almaguer C, Villa-Garcia M, Ruiz-Noriega M, Patton-Vogt J, Henry SA (2008) Cell wall integrity MAPK pathway is essential for lipid homeostasis. *J Biol Chem* 283 (49):34204-34217
- Peterson CL, Herskowitz I (1992) Characterization of the yeast *SWI1*, *SWI2*, and *SWI3* genes, which encode a global activator of transcription. *Cell* 68 (3):573-583
- Prelich G, Winston F (1993) Mutations that suppress the deletion of an upstream activating sequence in yeast: involvement of a protein kinase and histone H3 in repressing transcription *in vivo*. *Genetics* 135 (3):665-676
- Roberts SM, Winston F (1996) *SPT20/ADA5* encodes a novel protein functionally related to the TATA-binding protein and important for transcription in *Saccharomyces cerevisiae*. *Mol Cell Biol* 16 (6):3206-3213
- Scafe C, Nonet M, Young RA (1990b) RNA polymerase II mutants defective in transcription of a subset of genes. *Mol Cell Biol* 10 (3):1010-1016
- Shen X, Ranallo R, Choi E, Wu C (2003a) Involvement of actin-related proteins in ATP-dependent chromatin remodeling. *Mol Cell* 12 (1):147-155
- Shi Y, Vaden DL, Ju S, Ding D, Geiger JH, Greenberg ML (2005) Genetic perturbation of glycolysis results in inhibition of de novo inositol biosynthesis. *J Biol Chem* 280 (51):41805-41810
- Shirra MK, Arndt KM (1999) Evidence for the involvement of the Glc7-Reg1 phosphatase and the Snf1-Snf4 kinase in the regulation of *INO1* transcription in *Saccharomyces cerevisiae*. *Genetics* 152 (1):73-87
- Shpakovski GV, Acker J, Wintzerith M, Lacroix JF, Thuriaux P, Vigneron M (1995) Four subunits that are shared by the three classes of RNA polymerase are functionally interchangeable between *Homo sapiens* and *Saccharomyces cerevisiae*. *Mol Cell Biol* 15 (9):4702-4710
- Sidrauski C, Cox JS, Walter P (1996) tRNA ligase is required for regulated mRNA splicing in the unfolded protein response. *Cell* 87 (3):405-413
- Walch-Solimena C, Novick P (1999) The yeast phosphatidylinositol-4-OH kinase pik1 regulates secretion at the Golgi. *Nat Cell Biol* 1 (8):523-525
- Whitters EA, Cleves AE, McGee TP, Skinner HB, Bankaitis VA (1993) SAC1p is an integral membrane protein that influences the cellular requirement for phospholipid transfer protein function and inositol in yeast. *J Cell Biol* 122 (1):79-94
- Wilson JD, Barlowe C (2010) Yet1p and Yet3p, the yeast homologs of BAP29 and BAP31, interact with the ER translocation apparatus and are required for inositol prototrophy. *J Biol Chem* (Apr 8) doi:10.1074/jbc.M109.080382.
- Woychik NA, Young RA (1989) RNA polymerase II subunit RPB4 is essential for high- and low-temperature yeast cell growth. *Mol Cell Biol* 9 (7):2854-2859
- Yu VP, Reed SI (2004) Cks1 is dispensable for survival in *Saccharomyces cerevisiae*. *Cell Cycle* 3 (11):1402-1404
